# Supplementary material for: Low anti-staphylococcal IgG responses in granulomatosis with polyangiitis patients despite long-term Staphylococcus aureus exposure
Source: PubMed Central journal article supplement (PMC5389034; doi:10.1038/srep08188), 2015-02-02
Supplement: srep08188-s1.pdf [file srep08188-s1.pdf]

# Supplementary Material

## Tables 1 – 5

### **Low anti-staphylococcal IgG responses in granulomatosis with polyangiitis patients despite long-term *Staphylococcus aureus* exposure**

Corinna Glasner<sup>1+</sup>, Mirjan M. van Timmeren<sup>2+</sup>, Tim Stobernack<sup>1</sup>, Till F. Omansen<sup>1</sup>, Erwin C. Raangs<sup>1</sup>, John W. Rossen<sup>1</sup>, Marcus C. de Goffau<sup>1</sup>, Jan P. Arends<sup>1</sup>, Greetje A. Kampinga<sup>1</sup>, Denny G.A.M. Koedijk<sup>1</sup>, Jolanda Neef<sup>1</sup>, Girbe Buist<sup>1</sup>, Mehri Tavakol<sup>3</sup>, Willem J. B. van Wamel<sup>3</sup>, Abraham Rutgers<sup>4</sup>, Coen A. Stegeman<sup>5</sup>, Cees G. M. Kallenberg<sup>4</sup>, Peter Heeringa<sup>2#</sup> and Jan Maarten van Dijk<sup>1##</sup>

<sup>+</sup>These authors contributed equally.

<sup>#</sup>These authors contributed equally.

<sup>1</sup>Department of Medical Microbiology, University of Groningen, University Medical Center Groningen, Hanzeplein 1, P.O. Box 30001, 9700 RB Groningen, The Netherlands

<sup>2</sup>Department of Pathology and Medical Biology, University of Groningen, University Medical Center Groningen, Hanzeplein 1, P.O. Box 30001, 9700 RB Groningen, The Netherlands

<sup>3</sup>Department of Medical Microbiology and Infectious Diseases, Erasmus MC, 's Gravendijkwal 230, 3015 CE Rotterdam, The Netherlands

<sup>4</sup>Department of Rheumatology and Clinical Immunology, University of Groningen, University Medical Center Groningen, Hanzeplein 1, P.O. Box 30001, 9700 RB Groningen, The Netherlands

<sup>5</sup>Department of Internal Medicine, Division of Nephrology, University of Groningen, University Medical Center Groningen, Hanzeplein 1, P.O. Box 30001, 9700 RB Groningen, The Netherlands

**Supplementary Table 1. Characteristics of GPA patients and HC whose serum samples were included in the multiplex *S. aureus* antibody assay.** In this retrospective study, we included 85 GPA patients (54 with generalized and 31 with limited disease), of which 71 were nasal *S. aureus* carriers (aged 54.7±15.2 years; 40 males) and 14 were non-carriers (aged 54.3±17.4 years; 9 males), and 18 HC, of which 10 were nasal *S. aureus* carriers (aged 33.6±11.8 years, 4 males) and 8 were non-carriers (aged 40.1±12.2 years, 1 male). All patients were PR3-ANCA positive, fulfilled the Chapel Hill Consensus Conference definitions for the diagnosis of GPA and regularly visited the University Medical Center Groningen (UMCG, The Netherlands)<sup>1</sup>. The patients were selected based on availability of stored nasal *S. aureus* isolates and/or serum samples, but formed a representative cohort of all GPA patients from our hospital. From 21 *S. aureus*-carrying GPA patients (aged 51.6±16.3 years; 11 males) and all 14 non-carriers serum samples from two to three different time points (diagnosis, remission, relapse) were included in the multiplex *S. aureus* antibody assay, as well as previously collected and described sera from the 18 HC<sup>2,3</sup>. From each HC at least two sera from different time points were included.

| GPA and HC | Sex | Disease extent | Serum | Disease phase | Age (years) | Time since diagnosis (years) | <i>S. aureus</i> carriage | <i>S. aureus</i> positive nasal swab (yes/no) | <i>S. aureus</i> sensitivity to co-trimoxazole | Antibiotic treatment | Vasculitis treatment | Serum IgG (g/L) | Serum date |
|------------|-----|----------------|-------|---------------|-------------|------------------------------|---------------------------|-----------------------------------------------|------------------------------------------------|----------------------|----------------------|-----------------|------------|
| 4          | m   | lim            | 1     | diagnosis     | 70          | 0.0                          | carrier                   | no                                            |                                                | -                    | -                    | 13.9            | 29/02/00   |
|            |     |                | 2     | remission     | 73          | 3.6                          |                           | yes                                           | resistant                                      | Ct                   | aza                  | 9.5             | 08/10/03   |
|            |     |                | 3     | relapse       | 71          | 1.5                          |                           | yes                                           | resistant                                      | Ct                   | -                    | 11.9            | 23/08/01   |
| 5          | m   | gen            | 1     | diagnosis     | 63          | 0.0                          | carrier                   | yes                                           | n.a.                                           | -                    | -                    | 27.2            | 11/05/94   |
|            |     |                | 2     | remission     | 66          | 2.5                          |                           | yes                                           | n.a.                                           | -                    | -                    | 10.7            | 13/11/96   |
| 8          | m   | lim            | 1     | remission     | 63          | 13.2                         | carrier                   | no                                            |                                                | Ct                   | aza, pred            | n.a.            | 29/02/12   |
|            |     |                | 2     | relapse       | 61          | 11.7                         |                           | no                                            |                                                | Ct                   | aza                  | n.a.            | 15/09/10   |
| 9          | m   | gen            | 1     | diagnosis     | 79          | 0.0                          | carrier                   | no                                            |                                                | -                    | -                    | n.a.            | 05/05/05   |
|            |     |                | 2     | remission     | 82          | 2.4                          |                           | n.a.                                          |                                                | -                    | aza, pred            | n.a.            | 02/10/07   |
|            |     |                | 3     | relapse       | 81          | 1.3                          |                           | n.a.                                          |                                                | Ct                   | aza                  | n.a.            | 11/08/06   |
| 15         | f   | lim            | 1     | remission     | 39          | 11.7                         | carrier                   | yes                                           | sensitive                                      | Ct                   | aza, pred            | n.a.            | 16/08/00   |
|            |     |                | 2     | relapse       | 36          | 9.0                          |                           | yes                                           | resistant                                      | Ct                   | aza, pred            | n.a.            | 18/12/97   |
| 16         | m   | lim            | 1     | remission     | 63          | 19.4                         | carrier                   | yes                                           | resistant                                      | Ct                   | aza, pred            | n.a.            | 21/10/09   |
|            |     |                | 2     | relapse       | 52          | 8.0                          |                           | yes                                           | intermediate                                   | Ct                   | aza, pred            | n.a.            | 06/05/98   |
| 18         | m   | lim            | 1     | diagnosis     | 55          | 0.0                          | carrier                   | no                                            |                                                | -                    | -                    | 14.4            | 06/11/96   |
|            |     |                | 2     | remission     | 62          | 6.9                          |                           | yes                                           | n.a.                                           | Ct                   | aza                  | n.a.            | 24/09/03   |
|            |     |                | 3     | relapse       | 57          | 2.0                          |                           | no                                            |                                                | Ct                   | -                    | n.a.            | 04/11/98   |
| 20         | m   | gen            | 1     | remission     | 41          | 4.6                          | carrier                   | no                                            |                                                | Ct                   | -                    | n.a.            | 30/10/96   |
|            |     |                | 2     | relapse       | 53          | 15.9                         |                           | yes                                           | sensitive                                      | -                    | -                    | n.a.            | 12/03/08   |
| 21         | f   | gen            | 1     | diagnosis     | 37          | 0.0                          | carrier                   | yes                                           | sensitive                                      | -                    | -                    | n.a.            | 09/02/07   |
|            |     |                | 2     | remission     | 38          | 1.1                          |                           | no                                            |                                                | Ct                   | -                    | n.a.            | 12/03/08   |
|            |     |                | 3     | relapse       | 40          | 3.3                          |                           | yes                                           | sensitive                                      | -                    | -                    | n.a.            | 28/05/10   |
| 22         | f   | gen            | 1     | remission     | 61          | 7.1                          | carrier                   | yes                                           | n.a.                                           | Ct                   | aza                  | n.a.            | 27/09/00   |
|            |     |                | 2     | relapse       | 62          | 7.9                          |                           | no                                            |                                                | Ct                   | aza                  | n.a.            | 02/08/01   |
| 23         | f   | gen            | 1     | diagnosis     | 25          | 0.0                          | carrier                   | n.a.                                          |                                                | -                    | -                    | 5.1             | 18/05/96   |
|            |     |                | 2     | remission     | 29          | 4.9                          |                           | yes                                           | resistant                                      | Ct                   | aza                  | 10.6            | 11/04/01   |
|            |     |                | 3     | relapse       | 26          | 1.8                          |                           | yes                                           | intermediate                                   | Ct                   | aza                  | 6.2             | 11/03/98   |
| 26         | f   | lim            | 1     | diagnosis     | 45          | 0.0                          | carrier                   | yes                                           | n.a.                                           | -                    | -                    | 10.2            | 25/01/00   |
|            |     |                | 2     | remission     | 46          | 1.2                          |                           | yes                                           | n.a.                                           | Ct                   | -                    | 10.1            | 25/04/01   |
|            |     |                | 3     | relapse       | 48          | 3.2                          |                           | yes                                           | resistant                                      | Ct                   | -                    | 11.0            | 26/03/03   |
| 27         | f   | lim            | 1     | diagnosis     | 33          | 0.1                          | carrier                   | yes                                           | sensitive                                      | Ct                   | -                    | 13.5            | 27/08/03   |
|            |     |                | 2     | remission     | 39          | 5.8                          |                           | yes                                           | sensitive                                      | Ct                   | aza                  | 11.3            | 14/05/09   |
|            |     |                | 3     | relapse       | 35          | 2.6                          |                           | yes                                           | sensitive                                      | Ct                   | cyc                  | 12.6            | 16/03/06   |
| 28         | m   | gen            | 1     | diagnosis     | 54          | 0.0                          | carrier                   | no                                            |                                                | Ct                   | -                    | 19.6            | 09/12/98   |
|            |     |                | 2     | remission     | 55          | 1.3                          |                           | no                                            |                                                | Ct                   | aza                  | 13.6            | 22/03/00   |
|            |     |                | 3     | relapse       | 55          | 1.5                          |                           | no                                            |                                                | Ct                   | -                    | 13.5            | 06/06/00   |
| 29         | f   | lim            | 1     | diagnosis     | 31          | 0.0                          | carrier                   | yes                                           | sensitive                                      | -                    | -                    | 15.2            | 19/10/00   |
|            |     |                | 2     | remission     | 40          | 9.0                          |                           | no                                            |                                                | Ct                   | aza                  | 9.2             | 14/10/09   |
|            |     |                | 3     | relapse       | 32          | 0.6                          |                           | no                                            |                                                | -                    | aza                  | 10.2            | 30/05/01   |
| 41         | f   | lim            | 1     | diagnosis     | 36          | 0.0                          | carrier                   | n.a.                                          |                                                | -                    | -                    | 14.5            | 12/07/94   |
|            |     |                | 2     | remission     | 44          | 7.4                          |                           | yes                                           | sensitive                                      | flu                  | mtx, pred            | 8.3             | 06/12/01   |
|            |     |                | 3     | relapse       | 39          | 3.0                          |                           | no                                            |                                                | Ct                   | -                    | 10.6            | 03/07/97   |
| 43         | m   | lim            | 1     | diagnosis     | 56          | 0.0                          | carrier                   | yes                                           | n.a.                                           | -                    | -                    | 12.9            | 22/10/93   |
|            |     |                | 2     | remission     | 63          | 7.9                          |                           | no                                            |                                                | Ct                   | pred                 | 10.4            | 03/10/01   |
|            |     |                | 3     | relapse       | 60          | 4.9                          |                           | no                                            |                                                | Ct                   | -                    | 13.2            | 23/09/98   |
| 54         | m   | lim            | 1     | remission     | 77          | 8.9                          | carrier                   | n.a.                                          |                                                | Ct                   | -                    | n.a.            | 05/06/96   |
|            |     |                | 2     | relapse       | 74          | 5.7                          |                           | n.a.                                          |                                                | n.a.                 | n.a.                 | n.a.            | 11/03/93   |
| 58         | m   | gen            | 1     | diagnosis     | 63          | 0.0                          | carrier                   | n.a.                                          |                                                | -                    | -                    | 20.1            | 02/10/92   |
|            |     |                | 2     | remission     | 67          | 4.1                          |                           | yes                                           | sensitive                                      | -                    | -                    | 16.6            | 06/11/96   |
|            |     |                | 3     | relapse       | 74          | 11.0                         |                           | n.a.                                          |                                                | n.a.                 | n.a.                 | 5.4             | 15/10/03   |
| 67         | f   | gen            | 1     | remission     | 53          | 7.8                          | carrier                   | no                                            |                                                | -                    | -                    | n.a.            | 27/01/94   |
|            |     |                | 2     | relapse       | 50          | 5.7                          |                           | n.a.                                          |                                                | n.a.                 | n.a.                 | n.a.            | 19/12/91   |
| 71         | f   | gen            | 1     | diagnosis     | 28          | 0.0                          | carrier                   | yes                                           | n.a.                                           | -                    | -                    | 22.9            | 13/04/94   |
|            |     |                | 2     | remission     | 31          | 3.3                          |                           | yes                                           | sensitive                                      | -                    | -                    | n.a.            | 17/07/97   |
|            |     |                | 3     | relapse       | 31          | 2.4                          |                           | yes                                           | n.a.                                           | Ct                   | aza                  | n.a.            | 19/09/96   |
| 72         | m   | gen            | 1     | diagnosis     | 57          | 0.0                          | non-carrier               | n.a.                                          |                                                | -                    | -                    | 27.3            | 15/04/94   |
|            |     |                | 2     | remission     | 59          | 1.8                          |                           | no                                            |                                                | -                    | -                    | n.a.            | 18/01/96   |
| 73         | m   | gen            | 1     | remission     | 73          | 0.5                          | non-carrier               | n.a.                                          |                                                | -                    | cyc, pred            | n.a.            | 03/03/94   |
|            |     |                | 2     | relapse       | 75          | 2.5                          |                           | n.a.                                          |                                                | -                    | cyc                  | n.a.            | 19/03/96   |
| 74         | m   | lim            | 1     | diagnosis     | 11          | 0.0                          | non-carrier               | no                                            |                                                | -                    | -                    | 10.2            | 26/08/09   |
|            |     |                | 2     | remission     | 11          | 0.3                          |                           | n.a.                                          |                                                | Ct                   | -                    | 9.1             | 26/11/09   |
| 75         | m   | lim            | 1     | diagnosis     | 75          | -0.1                         | non-carrier               | no                                            |                                                | -                    | -                    | 10.3            | 09/01/12   |
|            |     |                | 2     | remission     | 76          | 1.1                          |                           | no                                            |                                                | Ct                   | mtx                  | 9               | 05/04/13   |
| 76         | m   | gen            | 1     | diagnosis     | 47          | 0.0                          | non-carrier               | no                                            |                                                | -                    | -                    | 8.1             | 13/06/00   |
|            |     |                | 2     | remission     | 58          | 11.5                         |                           | no                                            |                                                | Ct                   | pred                 | 7.7             | 08/12/11   |
|            |     |                | 3     | relapse       | 61          | 2.3                          |                           | no                                            |                                                | Ct                   | mtx                  | 9.1             | 05/07/11   |
| 78         | m   | gen            | 1     | diagnosis     | 45          | 0.0                          | non-carrier               | no                                            |                                                | -                    | -                    | 13.8            | 20/03/02   |
|            |     |                | 2     | remission     | 52          | 6.9                          |                           | no                                            |                                                | -                    | -                    | 12              | 18/02/09   |
|            |     |                | 3     | relapse       | 52          | 7.7                          |                           | no                                            |                                                | -                    | -                    | 11.1            | 18/11/09   |

|      |   |     |   |           |      |     |             |    |           |           |          |          |
|------|---|-----|---|-----------|------|-----|-------------|----|-----------|-----------|----------|----------|
| 79   | m | gen | 2 | diagnosis | 58   | 0.0 | non-carrier | no | -         | -         | n.a.     | 20/08/10 |
| 80   | f | lim | 1 | diagnosis | 58   | 0.0 | non-carrier | no | -         | -         | 9.3      | 15/07/10 |
|      |   |     | 2 | remission | 60   | 1.6 | no          | Ct | aza       | 7.3       | 15/02/12 |          |
| 81   | f | gen | 1 | diagnosis | 60   | 0.0 | non-carrier | no | -         | -         | n.a.     | 27/07/02 |
|      |   |     | 2 | remission | 70   | 9.4 | no          | Ct | aza       | 7.9       | 09/12/11 |          |
|      |   |     | 3 | relapse   | 69   | 8.2 | no          | Ct | -         | 10.1      | 06/10/10 |          |
| 82   | m | gen | 1 | diagnosis | 34   | 0.1 | non-carrier | no | Ct        | cyc, pred | n.a.     | 03/05/07 |
|      |   |     | 2 | remission | 35   | 1.5 | no          | Ct | aza       | 9.5       | 18/09/08 |          |
| 83   | f | gen | 1 | diagnosis | 51   | 0.0 | non-carrier | no | -         | -         | 12.5     | 01/05/12 |
| 84   | f | gen | 1 | diagnosis | 73   | 0.0 | non-carrier | no | Ct        | cyc, pred | n.a.     | 16/01/06 |
|      |   |     | 2 | remission | 76   | 2.6 | no          | -  | mmf       | 10.6      | 01/08/08 |          |
| 85   | m | lim | 1 | diagnosis | 59   | 0.0 | non-carrier | no | Ct        | cyc, pred | n.a.     | 08/08/08 |
|      |   |     | 2 | remission | 60   | 1.4 | no          | Ct | aza, pred | 6.8       | 06/01/10 |          |
| HC1  | f |     | 1 |           | 40   |     | carrier     |    | -         | -         | 12.2     | 01/06/07 |
|      |   |     | 2 |           | 43   |     |             |    | -         | -         | 10.8     | 01/04/10 |
| HC2  | m |     | 1 |           | 23   |     | carrier     |    | -         | -         | n.a.     | 01/06/07 |
|      |   |     | 2 |           | 23.5 |     |             |    | -         | -         | n.a.     | 01/12/07 |
|      |   |     | 3 |           | 26   |     |             |    | -         | -         | 12.9     | 01/04/10 |
| HC3  | m |     | 1 |           | 42   |     | carrier     |    | -         | -         | n.a.     | 01/06/07 |
|      |   |     | 2 |           | 42.5 |     |             |    | -         | -         | n.a.     | 01/12/07 |
|      |   |     | 3 |           | 45   |     |             |    | -         | -         | 13.5     | 01/04/10 |
| HC4  | f |     | 1 |           | 32   |     | carrier     |    | -         | -         | n.a.     | 01/06/07 |
|      |   |     | 2 |           | 32.5 |     |             |    | -         | -         | 11.2     | 01/12/07 |
|      |   |     | 3 |           | 35   |     |             |    | -         | -         | 11.3     | 01/04/10 |
| HC5  | f |     | 1 |           | 53   |     | non-carrier |    | -         | -         | n.a.     | 01/06/07 |
|      |   |     | 2 |           | 53.5 |     |             |    | -         | -         | n.a.     | 01/12/07 |
|      |   |     | 3 |           | 56   |     |             |    | -         | -         | 11       | 01/04/10 |
| HC6  | m |     | 1 |           | 53   |     | non-carrier |    | -         | -         | n.a.     | 01/06/07 |
|      |   |     | 2 |           | 53.5 |     |             |    | -         | -         | n.a.     | 01/12/07 |
|      |   |     | 3 |           | 56   |     |             |    | -         | -         | 13.1     | 01/04/10 |
|      |   |     | 4 |           | 58   |     |             |    | -         | -         | 12.9     | 01/07/12 |
| HC7  | f |     | 1 |           | 53   |     | non-carrier |    | -         | -         | n.a.     | 01/06/07 |
|      |   |     | 2 |           | 54   |     |             |    | -         | -         | 11.3     | 01/02/08 |
|      |   |     | 3 |           | 58   |     |             |    | -         | -         | 10.7     | 01/07/12 |
| HC8  | m |     | 1 |           | 25   |     | carrier     |    | -         | -         | 9.4      | 01/04/10 |
|      |   |     | 2 |           | 27   |     |             |    | -         | -         | 10.1     | 01/07/12 |
| HC9  | f |     | 1 |           | 26   |     | carrier     |    | -         | -         | 10.9     | 01/04/10 |
|      |   |     | 2 |           | 28   |     |             |    | -         | -         | 9.9      | 01/07/12 |
| HC10 | m |     | 1 |           | 48   |     | carrier     |    | -         | -         | n.a.     | 01/06/07 |
|      |   |     | 2 |           | 49   |     |             |    | -         | -         | 11.5     | 01/02/08 |
| HC11 | f |     | 1 |           | 29   |     | carrier     |    | -         | -         | n.a.     | 01/06/07 |
|      |   |     | 2 |           | 30   |     |             |    | -         | -         | 12.5     | 01/02/08 |
| HC12 | f |     | 1 |           | 46   |     | non-carrier |    | -         | -         | n.a.     | 01/06/07 |
|      |   |     | 2 |           | 47   |     |             |    | -         | -         | 12.1     | 01/02/08 |
| HC13 | f |     | 1 |           | 27   |     | non-carrier |    | -         | -         | n.a.     | 01/06/07 |
|      |   |     | 2 |           | 28   |     |             |    | -         | -         | 9.9      | 01/02/08 |
| HC14 | f |     | 1 |           | 30   |     | carrier     |    | -         | -         | n.a.     | 01/06/07 |
|      |   |     | 2 |           | 31   |     |             |    | -         | -         | 10.7     | 01/02/08 |
| HC15 | f |     | 1 |           | 41   |     | carrier     |    | -         | -         | n.a.     | 01/06/07 |
|      |   |     | 2 |           | 41.5 |     |             |    | -         | -         | n.a.     | 01/12/07 |
| HC16 | f |     | 1 |           | 30   |     | non-carrier |    | -         | -         | n.a.     | 01/06/07 |
|      |   |     | 2 |           | 30.5 |     |             |    | -         | -         | n.a.     | 01/12/07 |
| HC17 | f |     | 1 |           | 27   |     | non-carrier |    | -         | -         | n.a.     | 01/06/07 |
|      |   |     | 2 |           | 27.5 |     |             |    | -         | -         | n.a.     | 01/12/07 |
| HC18 | f |     | 1 |           | 32   |     | non-carrier |    | -         | -         | n.a.     | 01/06/07 |
|      |   |     | 2 |           | 32.5 |     |             |    | -         | -         | n.a.     | 01/12/07 |

Abbreviations: HC = healthy control; lim = limited disease (upper and/or lower airway involvement not accompanied by glomerulonephritis); gen = generalized disease (including kidney involvement); Ct = co-trimoxazole; flu = flucloxacillin; aug = augmentin; aza = azathioprine; pred = prednisolone; cyc = cyclophosphamide; mtx = methotrexate; methylpred = methylprednisolone; - = no treatment; n.a. = not available.

## References

- Jennette, J. C. *et al.* 2012 Revised international chapel hill consensus conference nomenclature of vasculitides. *Arthritis Rheum* **65**, 1–11 (2013).
- Verkaik, N. J. *et al.* Anti-staphylococcal humoral immune response in persistent nasal carriers and noncarriers of *Staphylococcus aureus*. *J Infect Dis* **199**, 625–632 (2009).
- Verkaik, N. J. *et al.* Immune evasion cluster-positive bacteriophages are highly prevalent among human *Staphylococcus aureus* strains, but they are not essential in the first stages of nasal colonization. *Clin. Microbiol. Infec.* **17**, 343–348 (2011).

**Supplementary Table 2. Characteristics of GPA patients whose *S. aureus* isolates were typed.** From 71 GPA patients, a total of 210 *S. aureus* nasal isolates (1-8 per patient, median 3) with isolation dates between 1990 and 2012 were included in *S. aureus* DNA typing. Clinical data from the time of *S. aureus* isolation was retrieved from the patients' medical record. The number of diseases relapses occurring after *S. aureus* isolation was retrieved from the patients' medical records until the patients' death or December 31, 2012.

| Patient number | Sex | Disease extent | Organ involvement at the time of diagnosis | Isolate | Age (years) | Time since diagnosis (years) | Follow up of medical record (years) | No. of relapses | Disease activity | Antibiotic treatment | Vasculitis treatment | Sample | Co-trimoxazole phenotype |
|----------------|-----|----------------|--------------------------------------------|---------|-------------|------------------------------|-------------------------------------|-----------------|------------------|----------------------|----------------------|--------|--------------------------|
| 1              | m   | lim            | ent, lung, joints                          | 1       | 32          | 0.0                          | 10.9                                | 4               | a (9)            | Ct                   | -                    | Vas146 | S                        |
|                |     |                |                                            | 2       | 36          | 4.1                          | 6.8                                 | 1               | a (12)           | Ct                   | mmf, pred            | Vas001 | S                        |
|                |     |                |                                            | 3       | 43          | 10.7                         | 0.2                                 | 0               | q                | Ct                   | aza                  | Vas190 | R                        |
| 2              | m   | gen            | ent, lung, kidney, skin                    | 1       | 60          | 0.4                          | 10.8                                | 2               | q                | Ct                   | -                    | Vas151 | R                        |
|                |     |                |                                            | 2       | 62          | 2.3                          | 8.9                                 | 1               | q                | Ct                   | aza                  | Vas174 | R                        |
|                |     |                |                                            | 3       | 64          | 4.4                          | 6.8                                 | 0               | q                | Ct                   | aza, pred            | Vas002 | R                        |
|                |     |                |                                            | 4       | 70          | 10.3                         | 0.9                                 | 0               | q                | Ct                   | aza, pred            | Vas003 | R                        |
| 3              | m   | gen            | ent, lung, kidney, skin                    | 1       | 37          | 0.1                          | 6.8                                 | 0               | q                | Ct                   | cyc, pred            | Vas004 | R                        |
|                |     |                |                                            | 2       | 37          | 0.3                          | 6.6                                 | 0               | q                | Ct                   | cyc, pred            | Vas005 | R                        |
|                |     |                |                                            | 3       | 37          | 0.4                          | 6.5                                 | 0               | q                | Ct                   | cyc, pred            | Vas006 | R                        |
| 4*             | m   | lim            | ent                                        | 1       | 76          | 6.1                          | 4.9                                 | 0               | q                | -                    | -                    | Vas007 | R                        |
| 5*             | m   | gen            | ent, kidney, skin, neuro, bowel            | 1       | 66          | 2.3                          | 16.3                                | 0               | q                | -                    | -                    | Vas052 | S                        |
|                |     |                |                                            | 2       | 66          | 2.5                          | 16.0                                | 0               | q                | -                    | -                    | Vas053 | S                        |
|                |     |                |                                            | 3       | 71          | 7.7                          | 10.8                                | 0               | q                | -                    | -                    | Vas149 | R                        |
|                |     |                |                                            | 4       | 75          | 11.9                         | 6.6                                 | 0               | q                | -                    | -                    | Vas008 | S                        |
| 6              | m   | gen            | ent, lung, kidney                          | 1       | 62          | 0.8                          | 6.5                                 | 0               | q                | -                    | aza, pred            | Vas009 | S                        |
|                |     |                |                                            | 2       | 57          | 9.5                          | 6.2                                 | 0               | q                | Ct                   | cyc, pred            | Vas010 | R                        |
| 8*             | m   | lim            | ent                                        | 1       | 51          | 1.9                          | 12.0                                | 5               | q                | Ct                   | mtx, pred            | Vas222 | R                        |
|                |     |                |                                            | 2       | 57          | 7.3                          | 6.6                                 | 1               | q                | Ct                   | cyc, pred            | Vas011 | R                        |
|                |     |                |                                            | 3       | 57          | 7.8                          | 6.2                                 | 1               | q                | Ct                   | cyc, pred            | Vas012 | R                        |
|                |     |                |                                            | 4       | 61          | 11.9                         | 2.0                                 | 0               | q                | Ct                   | aza, pred            | Vas013 | R                        |
|                |     |                |                                            | 5       | 62          | 12.1                         | 1.8                                 | 0               | q                | Ct                   | aza, pred            | Vas014 | R                        |
|                |     |                |                                            | 6       | 63          | 13.1                         | 0.8                                 | 0               | q                | Ct                   | aza, pred            | Vas178 | R                        |
| 9*             | m   | gen            | lung, kidney, neuro                        | 1       | 80          | 0.3                          | 2.7                                 | 1               | q                | Ct                   | cyc, pred            | Vas175 | R                        |
|                |     |                |                                            | 2       | 80          | 1.0                          | 2.1                                 | 1               | q                | Ct                   | aza, pred            | Vas015 | R                        |
|                |     |                |                                            | 3       | 81          | 1.4                          | 1.7                                 | 0               | q                | Ct                   | pred                 | Vas016 | R                        |
|                |     |                |                                            | 4       | 81          | 1.4                          | 1.7                                 | 0               | q                | Ct                   | pred                 | Vas017 | R                        |
| 10             | m   | lim            | ent                                        | 1       | 53          | 1.4                          | 6.5                                 | 1               | a (6)            | -                    | cyc, pred            | Vas018 | S                        |
|                |     |                |                                            | 2       | 53          | 1.6                          | 6.3                                 | 1               | q                | Ct                   | cyc, pred            | Vas019 | S                        |
|                |     |                |                                            | 3       | 54          | 2.0                          | 5.9                                 | 1               | q                | Ct                   | cyc, pred            | Vas020 | S                        |
|                |     |                |                                            | 4       | 54          | 2.1                          | 5.8                                 | 1               | q                | Ct                   | cyc, pred            | Vas021 | R                        |
| 11             | m   | gen            | ent, lung, kidney, skin, joints, neuro     | 1       | 29          | 8.9                          | 12.9                                | 0               | q                | -                    | -                    | Vas196 | S                        |
|                |     |                |                                            | 2       | 33          | 12.3                         | 9.5                                 | 0               | q                | -                    | -                    | Vas166 | S                        |
|                |     |                |                                            | 3       | 36          | 15.9                         | 5.9                                 | 0               | q                | -                    | -                    | Vas022 | S                        |
|                |     |                |                                            | 4       | 42          | 21.7                         | 0.1                                 | 0               | q                | -                    | -                    | Vas191 | S                        |
| 12             | m   | gen            | ent, eyes, kidney, joints                  | 1       | 77          | 1.4                          | 0.3                                 | 0               | a (14)           | Ct                   | aza                  | Vas023 | S                        |
| 13             | m   | gen            | lung, kidney, skin, joint                  | 1       | 47          | 8.9                          | 5.6                                 | 0               | q                | Ct                   | -                    | Vas024 | R                        |
| 14             | m   | gen            | ent, kidney, neuro                         | 1       | 71          | 8.9                          | 4.3                                 | 1               | q                | Ct                   | mmf, pred            | Vas025 | R                        |
|                |     |                |                                            | 2       | 71          | 8.9                          | 4.3                                 | 1               | q                | Ct                   | mmf, pred            | Vas027 | R                        |
| 15*            | f   | lim            | ent                                        | 1       | 32          | 4.9                          | 19.1                                | 3               | a (4)            | Ct                   | cyc, pred            | Vas082 | S                        |
|                |     |                |                                            | 2       | 32          | 4.9                          | 19.1                                | 3               | a (4)            | Ct                   | cyc, pred            | Vas083 | S                        |
|                |     |                |                                            | 3       | 39          | 11.8                         | 12.2                                | 0               | q                | Ct                   | aza, pred            | Vas220 | R                        |
|                |     |                |                                            | 4       | 40          | 13.3                         | 10.7                                | 0               | q                | Ct                   | aza, pred            | Vas155 | R                        |
|                |     |                |                                            | 5       | 41          | 14.1                         | 9.9                                 | 0               | q                | Ct                   | aza, pred            | Vas160 | R                        |
|                |     |                |                                            | 6       | 47          | 20.4                         | 3.6                                 | 0               | q                | Ct                   | aza, pred            | Vas028 | R                        |
|                |     |                |                                            | 7       | 49          | 21.8                         | 2.2                                 | 0               | q                | Ct                   | aza, pred            | Vas029 | R                        |
|                |     |                |                                            | 8       | 51          | 23.8                         | 0.2                                 | 0               | q                | mupi, mino           | pred                 | Vas186 | R                        |
| 16*            | m   | lim            | ent, lung (trachea)                        | 1       | 47          | 3.0                          | 17.8                                | 8               | q                | Ct                   | -                    | Vas131 | S                        |
|                |     |                |                                            | 2       | 48          | 3.6                          | 17.3                                | 7               | a (4)            | -                    | cyc, pred            | Vas132 | S                        |
|                |     |                |                                            | 3       | 57          | 13.3                         | 7.6                                 | 1               | a (4)            | Ct                   | aza, pred            | Vas172 | R                        |
|                |     |                |                                            | 4       | 63          | 19.0                         | 1.9                                 | 0               | q                | Ct                   | aza, pred            | Vas030 | R                        |
|                |     |                |                                            | 5       | 65          | 20.6                         | 0.3                                 | 0               | q                | Ct                   | aza, pred            | Vas031 | R                        |
| 17             | f   | lim            | ent, joints                                | 1       | 54          | 3.6                          | 12.6                                | 0               | q                | -                    | -                    | Vas210 | S                        |
|                |     |                |                                            | 2       | 63          | 12.7                         | 3.5                                 | 0               | q                | -                    | -                    | Vas032 | S                        |
|                |     |                |                                            | 3       | 67          | 16.1                         | 0.1                                 | 0               | q                | doxy                 | -                    | Vas192 | S                        |
| 18*            | m   | lim            | ent                                        | 1       | 59          | 3.6                          | 10.9                                | 1               | q                | Ct                   | cyc, pred            | Vas213 | R                        |
|                |     |                |                                            | 2       | 60          | 5.3                          | 9.3                                 | 1               | q                | Ct                   | aza, pred            | Vas153 | R                        |
|                |     |                |                                            | 3       | 68          | 13.2                         | 1.4                                 | 0               | q                | Ct                   | aza, pred            | Vas033 | R                        |
| 19             | m   | gen            | ent, lung, kidney, skin                    | 1       | 29          | 1.4                          | 12.7                                | 4               | q                | -                    | aza                  | Vas209 | S                        |
|                |     |                |                                            | 2       | 39          | 12.0                         | 2.0                                 | 1               | q                | Ct                   | aza                  | Vas035 | S                        |
|                |     |                |                                            | 1       | 37          | 0.3                          | 20.3                                | 4               | q                | -                    | cyc, pred            | Vas065 | S                        |
|                |     |                |                                            | 2       | 39          | 2.4                          | 18.2                                | 4               | q                | -                    | -                    | Vas066 | S                        |
|                |     |                |                                            | 3       | 44          | 7.8                          | 12.9                                | 4               | q                | Ct                   | -                    | Vas195 | R                        |
|                |     |                |                                            | 4       | 46          | 9.8                          | 10.8                                | 4               | q                | Ct                   | -                    | Vas147 | R                        |
| 20*            | m   | gen            | ent, lung (trachea), kidney, joints        | 1       | 37          | 0.3                          | 20.3                                | 4               | q                | -                    | cyc, pred            | Vas065 | S                        |
|                |     |                |                                            | 2       | 39          | 2.4                          | 18.2                                | 4               | q                | -                    | -                    | Vas066 | S                        |
|                |     |                |                                            | 3       | 44          | 7.8                          | 12.9                                | 4               | q                | Ct                   | -                    | Vas195 | R                        |
|                |     |                |                                            | 4       | 46          | 9.8                          | 10.8                                | 4               | q                | Ct                   | -                    | Vas147 | R                        |
|                |     |                |                                            | 5       | 55          | 18.6                         | 2.0                                 | 1               | q                | Ct                   | aza, pred            | Vas036 | R                        |
|                |     |                |                                            | 6       | 57          | 20.4                         | 0.2                                 | 0               | q                | Ct                   | pred                 | Vas189 | R                        |
| 21*            | f   | gen            | ent, kidney, joints, neuro                 | 1       | 41          | 3.8                          | 2.0                                 | 0               | q                | Ct                   | cyc, pred            | Vas037 | R                        |
|                |     |                |                                            | 2       | 41          | 4.0                          | 1.8                                 | 0               | q                | Ct                   | aza, pred            | Vas038 | R                        |
|                |     |                |                                            | 3       | 41          | 4.3                          | 1.5                                 | 0               | q                | Ct                   | aza                  | Vas039 | R                        |
|                |     |                |                                            | 4       | 42          | 5.4                          | 0.4                                 | 0               | q                | -                    | aza                  | Vas185 | S                        |
| 22*            | f   | gen            | ent, eyes, lung, kidney, skin, joints      | 1       | 54          | 0.3                          | 17.8                                | 3               | q                | Ct                   | cyc, pred            | Vas086 | S                        |
|                |     |                |                                            | 2       | 63          | 8.5                          | 9.6                                 | 0               | q                | Ct                   | cyc, pred            | Vas154 | R                        |
|                |     |                |                                            | 3       | 72          | 17.7                         | 0.4                                 | 0               | q                | Ct                   | pred                 | Vas040 | R                        |
| 23*            | f   | gen            | ent, lung, kidney                          | 1       | 28          | 3.9                          | 12.6                                | 1               | q                | Ct                   | aza                  | Vas211 | R                        |
|                |     |                |                                            | 2       | 30          | 5.6                          | 10.9                                | 1               | q                | Ct                   | aza                  | Vas145 | R                        |
|                |     |                |                                            | 3       | 40          | 15.1                         | 1.5                                 | 0               | q                | Ct                   | -                    | Vas041 | R                        |

|     |   |     |                                  |   |    |      |      |   |       |          |           |        |   |
|-----|---|-----|----------------------------------|---|----|------|------|---|-------|----------|-----------|--------|---|
|     |   |     |                                  | 4 | 40 | 16.0 | 0.5  | 0 | q     | Ct       | -         | Vas184 | R |
| 24  | f | gen | ent, lung, kidney, joints, neuro | 1 | 38 | 1.9  | 12.7 | 1 | q     | Ct       | aza       | Vas205 | R |
|     |   |     |                                  | 2 | 40 | 3.8  | 10.8 | 1 | q     | Ct       | -         | Vas150 | R |
|     |   |     |                                  | 3 | 49 | 12.9 | 1.8  | 0 | q     | Ct       | aza, pred | Vas042 | R |
|     |   |     |                                  | 4 | 50 | 13.7 | 0.9  | 0 | q     | Ct       | aza, pred | Vas043 | R |
|     |   |     |                                  | 5 | 50 | 13.9 | 0.7  | 0 | q     | Ct       | aza, pred | Vas180 | R |
| 25  | m | lim | ent                              | 1 | 66 | 10.8 | 0.9  | 0 | q     | Ct       | mmf, pred | Vas044 | R |
|     |   |     |                                  | 2 | 66 | 11.2 | 0.6  | 0 | q     | Ct       | mmf, pred | Vas181 | R |
| 26* | f | lim | ent                              | 1 | 45 | 0.0  | 12.8 | 3 | a (4) | Ct       | -         | Vas202 | R |
|     |   |     |                                  | 2 | 47 | 2.0  | 10.8 | 3 | q     | Ct       | mtx       | Vas148 | R |
|     |   |     |                                  | 3 | 48 | 3.0  | 9.9  | 3 | q     | Ct       | -         | Vas161 | R |
|     |   |     |                                  | 4 | 57 | 11.9 | 0.9  | 0 | a (3) | Ct       | -         | Vas045 | R |
|     |   |     |                                  | 5 | 58 | 12.6 | 0.2  | 0 | q     | Ct       | aza, pred | Vas188 | R |
| 27* | f | lim | ent, lung (trachea)              | 1 | 33 | 0.1  | 9.2  | 3 | q     | -        | cyc, pred | Vas170 | S |
|     |   |     |                                  | 2 | 41 | 8.4  | 0.9  | 0 | q     | Ct       | cyc       | Vas046 | S |
|     |   |     |                                  | 3 | 42 | 8.8  | 0.6  | 0 | q     | Ct       | -         | Vas182 | S |
| 28* | m | gen | ent, kidney, joints              | 1 | 67 | 13.1 | 0.9  | 0 | q     | Ct       | aza, pred | Vas047 | R |
| 29* | f | lim | ent, joints                      | 1 | 43 | 11.3 | 0.9  | 0 | q     | Ct       | -         | Vas048 | R |
| 30  | m | gen | ent, lung, kidney                | 1 | 53 | 8.8  | 0.9  | 0 | q     | -        | -         | Vas049 | S |
| 31  | f | gen | kidney, joints                   | 1 | 65 | 5.9  | 19.5 | 3 | q     | -        | -         | Vas050 | S |
| 32  | m | gen | ent, kidney, lung, joints        | 1 | 48 | 17.5 | 10.8 | 3 | q     | BB       | -         | Vas054 | S |
|     |   |     |                                  | 2 | 49 | 18.5 | 9.7  | 3 | q     | -        | -         | Vas055 | S |
|     |   |     |                                  | 3 | 54 | 24.0 | 4.2  | 2 | q     | Ct, mupi | -         | Vas198 | S |
| 33  | f | lim | ent, eyes, joints                | 1 | 85 | 7.3  | 17.1 | 0 | q     | -        | -         | Vas056 | S |
| 34  | f | lim | ent                              | 1 | 50 | 3.7  | 19.5 | 0 | q     | -        | -         | Vas057 | S |
|     |   |     |                                  | 2 | 51 | 4.5  | 18.7 | 0 | q     | -        | -         | Vas058 | S |
| 35  | f | lim | ent, joints                      | 1 | 50 | 4.6  | 1.3  | 0 | q     | Ct, mupi | pred      | Vas059 | R |
|     |   |     |                                  | 2 | 51 | 5.9  | 0.0  | 0 | q     | mino     | pred      | Vas060 | R |
| 36  | m | gen | ent, lung, kidney, joints        | 1 | 29 | 3.1  | 20.7 | 5 | q     | -        | cyc, pred | Vas061 | S |
|     |   |     |                                  | 2 | 32 | 6.9  | 16.9 | 3 | a (4) | Ct       | aza       | Vas062 | S |
|     |   |     |                                  | 3 | 37 | 10.9 | 12.9 | 2 | q     | Ct       | -         | Vas199 | R |
|     |   |     |                                  | 4 | 39 | 13.0 | 10.8 | 2 | q     | -        | -         | Vas152 | S |
| 37  | m | gen | ent, eyes, lung, kidney, joints  | 1 | 59 | 11.4 | 6.3  | 1 | q     | -        | -         | Vas063 | S |
|     |   |     |                                  | 2 | 61 | 13.6 | 4.2  | 0 | q     | -        | -         | Vas064 | S |
| 38  | m | gen | eyes, lung, kidney, joints       | 1 | 52 | 16.7 | 5.7  | 5 | q     | -        | cyc, pred | Vas067 | S |
|     |   |     |                                  | 2 | 56 | 19.9 | 2.5  | 3 | q     | Ct, mupi | cyc, pred | Vas068 | S |
| 39  | m | gen | ent, kidney                      | 1 | 42 | 8.9  | 19.3 | 3 | q     | Ct       | cyc, pred | Vas069 | S |
|     |   |     |                                  | 2 | 45 | 12.2 | 16.0 | 2 | a (8) | Ct       | cyc, pred | Vas070 | R |
|     |   |     |                                  | 3 | 49 | 16.0 | 12.2 | 2 | q     | Ct       | aza       | Vas217 | S |
|     |   |     |                                  | 4 | 51 | 18.7 | 9.5  | 1 | q     | Ct       | aza       | Vas168 | S |
| 40  | m | lim | ent, lung                        | 1 | 75 | 5.2  | 11.6 | 0 | q     | -        | -         | Vas071 | S |
|     |   |     |                                  | 2 | 76 | 5.7  | 11.0 | 0 | q     | -        | -         | Vas072 | S |
|     |   |     |                                  | 3 | 78 | 7.8  | 8.9  | 0 | q     | -        | -         | Vas073 | S |
|     |   |     |                                  | 4 | 82 | 11.9 | 4.8  | 0 | q     | -        | -         | Vas208 | S |
|     |   |     |                                  | 5 | 85 | 15.1 | 1.6  | 0 | q     | -        | -         | Vas167 | S |
| 41* | f | lim | ent, joints                      | 1 | 37 | 0.8  | 17.6 | 5 | q     | Ct       | -         | Vas074 | S |
|     |   |     |                                  | 2 | 46 | 9.1  | 9.3  | 2 | q     | Ct       | pred      | Vas171 | S |
| 42  | f | gen | ent, kidney, joints, skin, bowel | 1 | 21 | 0.9  | 22.2 | 7 | a (2) | Ct       | pred      | Vas075 | S |
|     |   |     |                                  | 2 | 22 | 1.6  | 21.5 | 6 | q     | Ct       | cyc, pred | Vas076 | S |
|     |   |     |                                  | 3 | 24 | 4.1  | 19.0 | 5 | q     | Ct       | -         | Vas077 | S |
|     |   |     |                                  | 4 | 31 | 10.5 | 12.6 | 5 | q     | -        | -         | Vas212 | S |
|     |   |     |                                  | 5 | 33 | 13.3 | 9.8  | 4 | q     | -        | -         | Vas162 | S |
| 43* | m | lim | penis, brains                    | 1 | 56 | 0.5  | 11.4 | 1 | q     | -        | cyc, pred | Vas078 | S |
|     |   |     |                                  | 2 | 56 | 1.0  | 11.0 | 1 | q     | -        | cyc, pred | Vas079 | S |
| 44  | m | gen | kidney, joints                   | 1 | 51 | 4.2  | 17.0 | 5 | q     | -        | -         | Vas080 | S |
|     |   |     |                                  | 2 | 52 | 4.9  | 16.3 | 5 | q     | -        | -         | Vas081 | R |
|     |   |     |                                  | 3 | 56 | 9.0  | 12.1 | 2 | q     | Ct       | -         | Vas221 | R |
| 45  | f | gen | ent, lung, kidney, joints        | 1 | 64 | 19.9 | 5.6  | 0 | q     | -        | pred      | Vas084 | S |
|     |   |     |                                  | 2 | 66 | 22.0 | 3.5  | 0 | q     | -        | pred      | Vas085 | S |
| 46  | f | gen | ent, kidney, skin                | 1 | 70 | 13.7 | 4.0  | 3 | q     | -        | -         | Vas087 | S |
|     |   |     |                                  | 2 | 71 | 13.9 | 3.8  | 3 | q     | doxy     | -         | Vas088 | S |
|     |   |     |                                  | 3 | 71 | 14.3 | 3.4  | 2 | a (6) | doxy     | pred      | Vas089 | S |
| 47  | m | gen | ent, lung, kidney                | 1 | 71 | 0.2  | 10.6 | 0 | q     | mupi     | cyc, pred | Vas090 | S |
| 48  | f | gen | ent, lung, kidney                | 1 | 69 | 11.0 | 7.2  | 0 | q     | Ct       | pred      | Vas091 | R |
|     |   |     |                                  | 2 | 69 | 11.0 | 7.2  | 0 | q     | Ct       | pred      | Vas092 | R |
|     |   |     |                                  | 3 | 69 | 11.0 | 7.2  | 0 | q     | Ct       | pred      | Vas093 | R |
|     |   |     |                                  | 4 | 70 | 12.0 | 6.3  | 0 | q     | Ct       | pred      | Vas094 | R |
|     |   |     |                                  | 5 | 75 | 17.6 | 0.6  | 0 | q     | Ct       | pred      | Vas203 | S |
| 49  | m | gen | ent, lung, kidney                | 1 | 66 | 15.6 | 19.0 | 1 | q     | -        | cyc, pred | Vas095 | S |
|     |   |     |                                  | 2 | 67 | 16.9 | 17.8 | 1 | q     | Ct       | pred      | Vas096 | S |
|     |   |     |                                  | 3 | 72 | 21.8 | 12.9 | 1 | q     | -        | -         | Vas194 | S |
| 50  | m | lim | ent, eyes, lung, joints          | 1 | 50 | 7.6  | 11.6 | 3 | q     | Ct       | pred      | Vas097 | R |
|     |   |     |                                  | 2 | 53 | 10.0 | 9.2  | 2 | q     | Ct       | cyc       | Vas098 | R |
|     |   |     |                                  | 3 | 59 | 16.4 | 2.7  | 0 | q     | Ct       | cyc, pred | Vas157 | R |
|     |   |     |                                  | 4 | 60 | 17.2 | 2.0  | 0 | q     | Ct       | aza, pred | Vas159 | R |
| 51  | f | lim | ent, lung                        | 1 | 49 | 0.1  | 17.3 | 2 | a (2) | -        | cyc, pred | Vas099 | S |
| 52  | f | lim | ent, lung (trachea)              | 1 | 75 | 8.7  | 3.4  | 0 | q     | Ct       | -         | Vas100 | S |
| 53  | f | lim | ent, joints, skin                | 1 | 67 | 7.4  | 12.5 | 0 | q     | -        | -         | Vas101 | S |
|     |   |     |                                  | 2 | 68 | 8.0  | 11.8 | 0 | q     | -        | -         | Vas102 | S |
|     |   |     |                                  | 3 | 73 | 13.7 | 6.2  | 0 | q     | -        | -         | Vas204 | S |
| 54* | m | lim | ent, lung, skin                  | 1 | 72 | 4.4  | 14.2 | 1 | a (5) | -        | cyc, pred | Vas103 | S |
|     |   |     |                                  | 2 | 73 | 4.5  | 14.1 | 1 | q     | -        | cyc, pred | Vas104 | S |
|     |   |     |                                  | 3 | 74 | 5.9  | 12.7 | 0 | q     | -        | cyc, pred | Vas105 | S |
|     |   |     |                                  | 4 | 81 | 12.6 | 6.1  | 0 | q     | Ct       | -         | Vas201 | R |
|     |   |     |                                  | 5 | 83 | 14.7 | 3.9  | 0 | q     | Ct       | -         | Vas156 | R |
| 55  | m | gen | ent, kidney                      | 1 | 83 | 10.9 | 5.9  | 0 | q     | doxy     | -         | Vas106 | S |
|     |   |     |                                  | 2 | 86 | 13.6 | 3.2  | 0 | q     | -        | -         | Vas107 | S |
| 56  | f | lim | ent, eyes, joints                | 1 | 51 | 5.7  | 18.9 | 9 | q     | -        | cyc, pred | Vas110 | S |
|     |   |     |                                  | 2 | 53 | 8.3  | 16.3 | 7 | a (3) | Ct       | cyc, pred | Vas111 | S |

|     |   |     |                                                       |   |    |      |      |    |       |          |           |        |   |
|-----|---|-----|-------------------------------------------------------|---|----|------|------|----|-------|----------|-----------|--------|---|
|     |   |     |                                                       | 3 | 57 | 11.9 | 12.7 | 6  | a (4) | Ct       | aza, pred | Vas206 | S |
| 57  | m | lim | lung, eyes                                            | 1 | 36 | 1.3  | 21.5 | 9  | q     | -        | cyc, pred | Vas112 | S |
|     |   |     |                                                       | 2 | 36 | 1.7  | 21.2 | 9  | q     | -        | cyc, pred | Vas113 | S |
|     |   |     |                                                       | 3 | 38 | 3.5  | 19.3 | 7  | a (9) | -        | cyc, pred | Vas114 | S |
|     |   |     |                                                       | 4 | 57 | 22.6 | 0.2  | 0  | q     | -        | mmf, pred | Vas187 | S |
| 58* | m | gen | ent, eyes, lung, kidney, joints, neuro                | 1 | 67 | 4.1  | 6.9  | 1  | q     | amoxy    | -         | Vas116 | S |
| 59  | m | lim | ent, lung                                             | 1 | 49 | 9.1  | 0.2  | 0  | q     | Ct       | -         | Vas117 | S |
|     |   |     |                                                       | 2 | 49 | 9.3  | 0.0  | 0  | q     | Ct       | -         | Vas118 | S |
| 60  | m | gen | ent, joints, kidney                                   | 1 | 64 | 7.6  | 9.4  | 3  | q     | Ct       | aza, pred | Vas119 | R |
|     |   |     |                                                       | 2 | 65 | 8.4  | 8.5  | 2  | q     | Ct, mupi | aza, pred | Vas120 | R |
|     |   |     |                                                       | 3 | 68 | 11.9 | 5.1  | 1  | q     | Ct, mupi | aza       | Vas121 | R |
|     |   |     |                                                       | 4 | 73 | 16.3 | 0.7  | 0  | q     | Ct, mupi | mmf, pred | Vas207 | R |
| 61  | f | gen | ent, eyes, lung, kidney, joints                       | 1 | 54 | 17.5 | 17.5 | 0  | q     | -        | -         | Vas122 | S |
|     |   |     |                                                       | 2 | 57 | 20.7 | 14.2 | 0  | q     | -        | -         | Vas123 | S |
|     |   |     |                                                       | 3 | 60 | 24.0 | 11.0 | 0  | q     | -        | -         | Vas197 | S |
| 62  | f | lim | ent, lung, joints, neuro                              | 1 | 52 | 4.1  | 14.5 | 4  | q     | -        | pred      | Vas124 | S |
|     |   |     |                                                       | 2 | 52 | 4.3  | 14.3 | 4  | q     | -        | pred      | Vas125 | S |
|     |   |     |                                                       | 3 | 60 | 12.7 | 5.9  | 1  | q     | -        | mmf, pred | Vas219 | R |
| 63  | f | gen | ent, eyes, kidney, joints                             | 1 | 60 | 7.6  | 11.9 | 0  | q     | -        | -         | Vas126 | S |
|     |   |     |                                                       | 2 | 66 | 14.1 | 5.4  | 0  | q     | -        | -         | Vas214 | S |
|     |   |     |                                                       | 3 | 69 | 16.8 | 2.7  | 0  | q     | -        | -         | Vas163 | S |
| 64  | f | gen | lung, kidney, bowel                                   | 1 | 28 | 5.0  | 19.4 | 0  | q     | -        | -         | Vas127 | S |
|     |   |     |                                                       | 2 | 29 | 6.5  | 17.8 | 0  | q     | Ct       | -         | Vas128 | S |
|     |   |     |                                                       | 3 | 34 | 11.5 | 12.9 | 0  | q     | -        | -         | Vas193 | S |
|     |   |     |                                                       | 4 | 38 | 15.0 | 9.4  | 0  | q     | Ct       | -         | Vas169 | S |
| 65  | m | gen | ent, lung, kidney, joints, neuro                      | 1 | 85 | 4.1  | 2.5  | 0  | q     | -        | cyc       | Vas129 | R |
|     |   |     |                                                       | 2 | 86 | 5.2  | 1.3  | 0  | q     | -        | -         | Vas130 | S |
| 66  | m | gen | ent, kidney, skin, bowel, neuro                       | 1 | 28 | 3.9  | 19.8 | 1  | q     | -        | aza, pred | Vas133 | S |
|     |   |     |                                                       | 2 | 29 | 5.3  | 18.3 | 0  | q     | -        | aza, pred | Vas134 | S |
| 67* | f | gen | eyes, lung, kidney, joints                            | 1 | 50 | 4.9  | 10.7 | 0  | q     | Ct       | -         | Vas135 | S |
|     |   |     |                                                       | 2 | 54 | 9.2  | 6.3  | 0  | q     | -        | -         | Vas136 | S |
| 68  | f | gen | ent, lung, kidney, joints, neuro                      | 1 | 61 | 1.0  | 17.8 | 0  | q     | -        | cyc, pred | Vas137 | S |
|     |   |     |                                                       | 2 | 63 | 2.8  | 15.9 | 0  | q     | -        | -         | Vas138 | S |
|     |   |     |                                                       | 3 | 68 | 7.7  | 11.1 | 0  | q     | -        | -         | Vas215 | S |
|     |   |     |                                                       | 4 | 71 | 11.1 | 7.6  | 0  | q     | -        | -         | Vas173 | S |
| 69  | f | gen | eyes, kidney, skin, joints, neuro                     | 1 | 38 | 1.2  | 19.5 | 2  | q     | -        | cyc, pred | Vas139 | S |
|     |   |     |                                                       | 2 | 40 | 3.2  | 17.5 | 1  | q     | -        | cyc       | Vas140 | S |
| 70  | f | gen | ent, eyes, kidney                                     | 1 | 64 | 1.9  | 4.7  | 0  | q     | -        | -         | Vas141 | S |
|     |   |     |                                                       | 2 | 67 | 4.4  | 2.2  | 0  | q     | -        | -         | Vas142 | S |
| 71* | f | gen | ent, eyes, lung, kidney, joints, neuro, skin, muscles | 1 | 28 | 0.2  | 18.5 | 13 | q     | -        | cyc, pred | Vas143 | S |
|     |   |     |                                                       | 2 | 30 | 2.0  | 16.7 | 13 | q     | -        | aza       | Vas144 | S |
|     |   |     |                                                       | 3 | 34 | 6.3  | 12.4 | 8  | q     | -        | aza, pred | Vas216 | S |
|     |   |     |                                                       | 4 | 37 | 9.0  | 9.7  | 6  | q     | Ct       | pred      | Vas164 | S |
|     |   |     |                                                       | 5 | 46 | 18.1 | 0.6  | 1  | q     | Ct       | mmf, pred | Vas183 | R |

Abbreviations: pat. = patient; \*= selected for Luminex analysis; gen = generalized disease (including kidney involvement); lim = limited disease (upper and/or lower airway involvement not accompanied by glomerulonephritis); a = active (BVAS score); q = quiescent; Ct = co-trimoxazole; mupi = mupirocin; mino = minocyclin; doxy = doxycyclin; amoxy = amoxicillin; mmf = mycophenolatemophetil; pred = prednisolone; aza = azathioprine; cyc = cyclophosphamide; mtx = methotrexate; R = resistance; S = sensitive.

**Supplementary Table 3. Characteristics of the 210 *S. aureus* isolates from GPA patients displayed in the order of the MLVF dendrogram and the 18 *S. aureus* isolates from the HC carriers.** *spa*-typing was performed as previously described <sup>1</sup>. Briefly, the protein A (*spa*) gene of *S. aureus* was PCR amplified and sequenced. Based on the detected variable number tandem repeats (VNTRs) and their composition, a specific *spa*-type was assigned using the Ridom StaphType software (version 2.2.1; Ridom GmbH, Würzburg, Germany) and the Ridom *Spa* Server (www.spaserver.ridom.de) <sup>2</sup>. To determine the clonal relatedness of the *S. aureus* population, the based upon repeat patterns (BURP) algorithm was applied (Ridom StaphType software 2.2.1) <sup>2</sup>. *Spa*-types with more than five repeats were clustered into different groups, the calculated cost between members of a group being  $\leq 4$  <sup>2</sup>. The MLVF experiment, including DNA isolation, multiplex PCR, separation of PCR products on the Bioanalyzer 2100 (Agilent Technologies), and data analyses with GelCompar II (Applied Maths, Sint-Martens-Latem, Belgium) were performed as recently described <sup>3,4</sup>. The position tolerance and optimization were set to 0.5% and 0.5%, respectively, and the dice formula was used to calculate the pairwise similarity coefficient. With the selected position tolerance, all Bioanalyzer runs for the control isolate M2 were identical. After visual inspection of the MLVF dendrogram, six different cut-off values (89%, 81%, 70%, 66%, 64%, 60% and 50%) were chosen for testing the concordance between MLVF and *spa*-typing.

| Sample | Patient Number | Isolate Number | Isolation Year | <i>spa</i> -type | Repeat Succession                   | MLVF pattern | MLVF cluster (66%) | <i>spa</i> -CC     | Co-trimoxazole phenotype | <i>tst</i> -1 |
|--------|----------------|----------------|----------------|------------------|-------------------------------------|--------------|--------------------|--------------------|--------------------------|---------------|
| Vas124 | 62             | 1              | 1992           | t021             | 15-12-16-02-16-02-25-17-24          | 1            | C1                 | <i>spa</i> -CC 012 | S                        | neg           |
| Vas125 | 62             | 2              | 1992           | t021             | 15-12-16-02-16-02-25-17-24          | 1            | C1                 | <i>spa</i> -CC 012 | S                        | neg           |
| Vas210 | 17             | 1              | 2000           | t435             | 14-44-13-17-17-17-23-18-17          | 2            | C1                 | singleton 8        | S                        | neg           |
| Vas189 | 20             | 6              | 2012           | t072             | 26-23-23-17-12-17-16                | 3            | C2                 | <i>spa</i> -CC 062 | R                        | neg           |
| Vas036 | 20             | 5              | 2010           | t072             | 26-23-23-17-12-17-16                | 3            | C2                 | <i>spa</i> -CC 062 | R                        | neg           |
| Vas214 | 63             | 2              | 2000           | t1306            | 15-12-16-02-16-02-16-02-25-17-24-24 | 4            | C3                 | <i>spa</i> -CC 012 | S                        | pos           |
| Vas055 | 32             | 2              | 1994           | t238             | 15-21-12-16-02-16-02-25-17-24-24    | 5            | C3                 | <i>spa</i> -CC 012 | S                        | pos           |
| Vas054 | 32             | 1              | 1993           | t012             | 15-12-16-02-16-02-25-17-24-24       | 6            | C3                 | <i>spa</i> -CC 012 | S                        | pos           |
| Vas101 | 53             | 1              | 1993           | t012             | 15-12-16-02-16-02-25-17-24-24       | 7            | C3                 | <i>spa</i> -CC 012 | S                        | pos           |
| Vas102 | 53             | 2              | 1994           | t012             | 15-12-16-02-16-02-25-17-24-24       | 7            | C3                 | <i>spa</i> -CC 012 | S                        | pos           |
| Vas135 | 67             | 1              | 1991           | t012             | 15-12-16-02-16-02-25-17-24-24       | 7            | C3                 | <i>spa</i> -CC 012 | S                        | pos           |
| Vas056 | 33             | 1              | 1995           | t012             | 15-12-16-02-16-02-25-17-24-24       | 7            | C3                 | <i>spa</i> -CC 012 | S                        | pos           |
| Vas074 | 41             | 1              | 1995           | t012             | 15-12-16-02-16-02-25-17-24-24       | 7            | C3                 | <i>spa</i> -CC 012 | S                        | pos           |
| Vas136 | 67             | 2              | 1995           | t021             | 15-12-16-02-16-02-25-17-24          | 8            | C3                 | <i>spa</i> -CC 012 | S                        | pos           |
| Vas075 | 42             | 1              | 1990           | t012             | 15-12-16-02-16-02-25-17-24-24       | 9            | C3                 | <i>spa</i> -CC 012 | S                        | pos           |
| Vas076 | 42             | 2              | 1991           | t012             | 15-12-16-02-16-02-25-17-24-24       | 9            | C3                 | <i>spa</i> -CC 012 | S                        | pos           |
| Vas212 | 42             | 4              | 2000           | t012             | 15-12-16-02-16-02-25-17-24-24       | 10           | C3                 | <i>spa</i> -CC 012 | S                        | neg           |
| Vas095 | 49             | 1              | 1993           | t685             | 15-12-16-02-16-02-24-24             | 11           | C4                 | <i>spa</i> -CC 012 | S                        | pos           |
| Vas096 | 49             | 2              | 1995           | t685             | 15-12-16-02-16-02-24-24             | 11           | C4                 | <i>spa</i> -CC 012 | S                        | pos           |
| Vas063 | 37             | 1              | 1993           | t021             | 15-12-16-02-16-02-25-17-24          | 12           | C5                 | <i>spa</i> -CC 012 | S                        | pos           |
| Vas064 | 37             | 2              | 1995           | t021             | 15-12-16-02-16-02-25-17-24          | 12           | C5                 | <i>spa</i> -CC 012 | S                        | pos           |
| Vas157 | 50             | 3              | 2002           | t021             | 15-12-16-02-16-02-25-17-24          | 13           | C5                 | <i>spa</i> -CC 012 | R                        | neg           |
| Vas159 | 50             | 4              | 2003           | t021             | 15-12-16-02-16-02-25-17-24          | 13           | C5                 | <i>spa</i> -CC 012 | R                        | neg           |
| Vas062 | 36             | 2              | 1996           | t021             | 15-12-16-02-16-02-25-17-24          | 14           | C5                 | <i>spa</i> -CC 012 | S                        | pos           |
| Vas143 | 71             | 1              | 1994           | t021             | 15-12-16-02-16-02-25-17-24          | 15           | C5                 | <i>spa</i> -CC 012 | S                        | neg           |
| Vas047 | 28             | 1              | 2012           | t021             | 15-12-16-02-16-02-25-17-24          | 16           | C5                 | <i>spa</i> -CC 012 | R                        | neg           |
| Vas192 | 17             | 3              | 2012           | t089             | 04-33-31-12-16-34-16-12-33-34       | 17           | C6                 | singleton 4        | S                        | pos           |
| Vas032 | 17             | 2              | 2009           | t089             | 04-33-31-12-16-34-16-12-33-34       | 17           | C6                 | singleton 4        | S                        | pos           |
| Vas167 | 40             | 5              | 2003           | t1077            | 14-44-12-17-23-18-17                | 18           | C6                 | singleton 9        | S                        | neg           |
| Vas208 | 40             | 4              | 2000           | t12042           | 14-44-12-17-17-23-24                | 18           | C6                 | singleton 15       | S                        | neg           |
| Vas071 | 40             | 1              | 1993           | t1077            | 14-44-12-17-23-18-17                | 18           | C6                 | singleton 9        | S                        | neg           |
| Vas072 | 40             | 2              | 1994           | t1077            | 14-44-12-17-23-18-17                | 18           | C6                 | singleton 9        | S                        | neg           |
| Vas073 | 40             | 3              | 1996           | t1077            | 14-44-12-17-23-18-17                | 18           | C6                 | singleton 9        | S                        | neg           |
| Vas087 | 46             | 1              | 1993           | t318             | 15-12-16-16-02-16-02-25-17-24       | 19           | C7                 | <i>spa</i> -CC 012 | S                        | pos           |
| Vas088 | 46             | 2              | 1993           | t318             | 15-12-16-16-02-16-02-25-17-24       | 19           | C7                 | <i>spa</i> -CC 012 | S                        | pos           |
| Vas089 | 46             | 3              | 1993           | t318             | 15-12-16-16-02-16-02-25-17-24       | 19           | C7                 | <i>spa</i> -CC 012 | S                        | pos           |
| Vas127 | 64             | 1              | 1993           | t012             | 15-12-16-02-16-02-25-17-24-24       | 20           | C7                 | <i>spa</i> -CC 012 | S                        | pos           |
| Vas170 | 27             | 1              | 2003           | t018             | 15-12-16-02-16-02-25-17-24-24-24    | 21           | C7                 | <i>spa</i> -CC 012 | S                        | pos           |
| Vas049 | 30             | 1              | 2012           | t015             | 08-16-02-16-34-13-17-34-16-34       | 22           | C8                 | singleton 1        | S                        | neg           |
| Vas194 | 49             | 3              | 2000           | t196             | 04-34-32-17-23-24                   | 23           | C9                 | singleton 7        | S                        | neg           |
| Vas018 | 10             | 1              | 2006           | t539             | 26-23-17-34-17-12-17-16             | 24           | C10                | <i>spa</i> -CC 062 | S                        | neg           |
| Vas019 | 10             | 2              | 2006           | t539             | 26-23-17-34-17-12-17-16             | 24           | C10                | <i>spa</i> -CC 062 | S                        | neg           |
| Vas020 | 10             | 3              | 2006           | t539             | 26-23-17-34-17-12-17-16             | 24           | C10                | <i>spa</i> -CC 062 | S                        | neg           |
| Vas021 | 10             | 4              | 2006           | t539             | 26-23-17-34-17-12-17-16             | 24           | C10                | <i>spa</i> -CC 062 | R                        | neg           |
| Vas133 | 66             | 1              | 1993           | t164             | 07-06-17-21-34-34-22-34             | 25           | C10                | singleton 6        | S                        | neg           |
| Vas134 | 66             | 2              | 1994           | t164             | 07-06-17-21-34-34-22-34             | 25           | C10                | singleton 6        | S                        | neg           |
| Vas009 | 6              | 1              | 2006           | t3092            | 07-23-12-21-12-17-20-17-12-17       | 26           | C10                | singleton 13       | S                        | neg           |
| Vas130 | 65             | 2              | 1996           | t062             | 26-23-17-12-17-16                   | 27           | C11                | <i>spa</i> -CC 062 | S                        | neg           |
| Vas050 | 31             | 1              | 1993           | t062             | 26-23-17-12-17-16                   | 27           | C11                | <i>spa</i> -CC 062 | S                        | neg           |
| Vas187 | 57             | 4              | 2012           | t002             | 26-23-17-34-17-20-17-12-17-16       | 28           | C11                | <i>spa</i> -CC 062 | S                        | neg           |
| Vas110 | 56             | 1              | 1994           | t002             | 26-23-17-34-17-20-17-12-17-16       | 29           | C11                | <i>spa</i> -CC 062 | S                        | neg           |
| Vas086 | 22             | 1              | 1993           | t002             | 26-23-17-34-17-20-17-12-17-16       | 29           | C11                | <i>spa</i> -CC 062 | S                        | neg           |
| Vas010 | 7              | 2              | 2006           | t224             | 07-23-12-21-17-34-33-34             | 30           | C11                | no founder         | R                        | neg           |
| Vas158 | 7              | 1              | 2002           | t002             | 26-23-17-34-17-20-17-12-17-16       | 30           | C11                | <i>spa</i> -CC 062 | S                        | neg           |
| Vas106 | 55             | 1              | 1993           | NT               |                                     | 31           | C12                | NT                 | S                        | neg           |
| Vas163 | 63             | 3              | 2003           | t2050            | 07-23-21-02-34                      | 32           | C12                | singleton 12       | S                        | neg           |
| Vas152 | 36             | 4              | 2002           | t034             | 08-16-02-25-02-25-34-24-25          | 33           | C13                | singleton 2        | S                        | neg           |
| Vas023 | 12             | 1              | 2007           | t1265            | 26-23-17-34-17-20-17-12-12-12-16    | 34           | C13                | <i>spa</i> -CC 062 | S                        | neg           |
| Vas084 | 45             | 1              | 1993           | t246             | 04-17-23-24-20-17-25                | 35           | C14                | no founder         | S                        | neg           |
| Vas085 | 45             | 2              | 1995           | t246             | 04-17-23-24-20-17-25                | 35           | C14                | no founder         | S                        | neg           |
| Vas078 | 43             | 1              | 1994           | t177             | 26-23-21-16-34-33-13                | 36           | C14                | no founder         | S                        | neg           |
| Vas185 | 21             | 4              | 2012           | t4584            | 26-23-13-23-31-05-17-25-17-25-23    | 37           | C14                | singleton 14       | S                        | neg           |
| Vas122 | 61             | 1              | 1993           | t026             | 08-16-34                            | 38           | C15                | excluded           | S                        | neg           |
| Vas123 | 61             | 2              | 1996           | t026             | 08-16-34                            | 38           | C15                | excluded           | S                        | neg           |
| Vas111 | 56             | 2              | 1996           | t026             | 08-16-34                            | 39           | C15                | excluded           | S                        | neg           |
| Vas116 | 58             | 1              | 1996           | t026             | 08-16-34                            | 39           | C15                | excluded           | S                        | neg           |
| Vas144 | 71             | 2              | 1996           | t026             | 08-16-34                            | 40           | C15                | excluded           | S                        | neg           |

|        |    |   |      |        |                               |    |     |              |   |     |
|--------|----|---|------|--------|-------------------------------|----|-----|--------------|---|-----|
| Vas197 | 61 | 3 | 2000 | t026   | 08-16-34                      | 41 | C15 | excluded     | S | neg |
| Vas061 | 36 | 1 | 1992 | t026   | 08-16-34                      | 42 | C15 | excluded     | S | neg |
| Vas001 | 1  | 2 | 2006 | t091   | 07-23-21-17-34-12-23-02-12-23 | 43 | C16 | singleton 5  | S | neg |
| Vas155 | 15 | 4 | 2002 | t091   | 07-23-21-17-34-12-23-02-12-23 | 43 | C16 | singleton 5  | R | neg |
| Vas160 | 15 | 5 | 2003 | t091   | 07-23-21-17-34-12-23-02-12-23 | 43 | C16 | singleton 5  | R | neg |
| Vas172 | 16 | 3 | 2003 | t091   | 07-23-21-17-34-12-23-02-12-23 | 43 | C16 | singleton 5  | R | neg |
| Vas186 | 15 | 8 | 2012 | t091   | 07-23-21-17-34-12-23-02-12-23 | 43 | C16 | singleton 5  | R | neg |
| Vas190 | 1  | 3 | 2012 | t091   | 07-23-21-17-34-12-23-02-12-23 | 43 | C16 | singleton 5  | R | neg |
| Vas198 | 32 | 3 | 2000 | t091   | 07-23-21-17-34-12-23-02-12-23 | 43 | C16 | singleton 5  | R | neg |
| Vas204 | 53 | 3 | 2000 | t091   | 07-23-21-17-34-12-23-02-12-23 | 43 | C16 | singleton 5  | R | neg |
| Vas220 | 15 | 3 | 2000 | t091   | 07-23-21-17-34-12-23-02-12-23 | 43 | C16 | singleton 5  | R | neg |
| Vas025 | 14 | 1 | 2008 | t091   | 07-23-21-17-34-12-23-02-12-23 | 43 | C16 | singleton 5  | R | neg |
| Vas027 | 14 | 1 | 2008 | t091   | 07-23-21-17-34-12-23-02-12-23 | 43 | C16 | singleton 5  | R | neg |
| Vas028 | 15 | 6 | 2009 | t091   | 07-23-21-17-34-12-23-02-12-23 | 43 | C16 | singleton 5  | R | neg |
| Vas029 | 15 | 7 | 2010 | t091   | 07-23-21-17-34-12-23-02-12-23 | 43 | C16 | singleton 5  | R | neg |
| Vas030 | 16 | 4 | 2009 | t091   | 07-23-21-17-34-12-23-02-12-23 | 43 | C16 | singleton 5  | R | neg |
| Vas031 | 16 | 5 | 2010 | t091   | 07-23-21-17-34-12-23-02-12-23 | 43 | C16 | singleton 5  | R | neg |
| Vas037 | 21 | 1 | 2010 | t091   | 07-23-21-17-34-12-23-02-12-23 | 43 | C16 | singleton 5  | S | neg |
| Vas038 | 21 | 2 | 2011 | t091   | 07-23-21-17-34-12-23-02-12-23 | 43 | C16 | singleton 5  | S | neg |
| Vas039 | 21 | 3 | 2011 | t091   | 07-23-21-17-34-12-23-02-12-23 | 43 | C16 | singleton 5  | R | neg |
| Vas011 | 8  | 2 | 2006 | t064   | 11-19-12-05-17-34-24-34-22-25 | 44 | C17 | spa-CC 064   | R | neg |
| Vas145 | 23 | 2 | 2002 | t064   | 11-19-12-05-17-34-24-34-22-25 | 44 | C17 | spa-CC 064   | R | neg |
| Vas147 | 20 | 4 | 2002 | t064   | 11-19-12-05-17-34-24-34-22-25 | 44 | C17 | spa-CC 064   | R | neg |
| Vas149 | 5  | 3 | 2002 | t064   | 11-19-12-05-17-34-24-34-22-25 | 44 | C17 | spa-CC 064   | R | neg |
| Vas150 | 24 | 2 | 2002 | t064   | 11-19-12-05-17-34-24-34-22-25 | 44 | C17 | spa-CC 064   | R | neg |
| Vas153 | 18 | 2 | 2002 | t2658  | 11-19-36-05-17-34-24-34-22-25 | 44 | C17 | spa-CC 064   | R | neg |
| Vas156 | 54 | 5 | 2002 | t064   | 11-19-12-05-17-34-24-34-22-25 | 44 | C17 | spa-CC 064   | R | neg |
| Vas180 | 24 | 5 | 2012 | t064   | 11-19-12-05-17-34-24-34-22-25 | 44 | C17 | spa-CC 064   | R | neg |
| Vas181 | 25 | 2 | 2012 | t064   | 11-19-12-05-17-34-24-34-22-25 | 44 | C17 | spa-CC 064   | R | neg |
| Vas195 | 20 | 3 | 2000 | t064   | 11-19-12-05-17-34-24-34-22-25 | 44 | C17 | spa-CC 064   | R | neg |
| Vas199 | 36 | 3 | 2000 | t064   | 11-19-12-05-17-34-24-34-22-25 | 44 | C17 | spa-CC 064   | R | neg |
| Vas201 | 54 | 4 | 2000 | t064   | 11-19-12-05-17-34-24-34-22-25 | 44 | C17 | spa-CC 064   | R | neg |
| Vas205 | 24 | 1 | 2000 | t064   | 11-19-12-05-17-34-24-34-22-25 | 44 | C17 | spa-CC 064   | R | neg |
| Vas207 | 60 | 4 | 2000 | t064   | 11-19-12-05-17-34-24-34-22-25 | 44 | C17 | spa-CC 064   | R | neg |
| Vas211 | 23 | 1 | 2000 | t064   | 11-19-12-05-17-34-24-34-22-25 | 44 | C17 | spa-CC 064   | R | neg |
| Vas213 | 18 | 1 | 2000 | t2658  | 11-19-36-05-17-34-24-34-22-25 | 44 | C17 | spa-CC 064   | R | neg |
| Vas219 | 62 | 3 | 2000 | t064   | 11-19-12-05-17-34-24-34-22-25 | 44 | C17 | spa-CC 064   | R | neg |
| Vas222 | 8  | 1 | 2000 | t064   | 11-19-12-05-17-34-24-34-22-25 | 44 | C17 | spa-CC 064   | R | neg |
| Vas024 | 13 | 1 | 2007 | t064   | 11-19-12-05-17-34-24-34-22-25 | 44 | C17 | spa-CC 064   | R | neg |
| Vas033 | 18 | 3 | 2010 | t2658  | 11-19-36-05-17-34-24-34-22-25 | 44 | C17 | spa-CC 064   | R | neg |
| Vas041 | 23 | 3 | 2011 | t12249 | 11-12-05-17-34-24-34-17-22-25 | 44 | C17 | spa-CC 064   | R | neg |
| Vas042 | 24 | 3 | 2011 | t064   | 11-19-12-05-17-34-24-34-22-25 | 44 | C17 | spa-CC 064   | R | neg |
| Vas043 | 24 | 4 | 2011 | t064   | 11-19-12-05-17-34-24-34-22-25 | 44 | C17 | spa-CC 064   | R | neg |
| Vas048 | 29 | 1 | 2012 | t064   | 11-19-12-05-17-34-24-34-22-25 | 44 | C17 | spa-CC 064   | R | neg |
| Vas007 | 4  | 1 | 2006 | t064   | 11-19-12-05-17-34-24-34-22-25 | 44 | C17 | spa-CC 064   | R | neg |
| Vas070 | 39 | 2 | 1996 | t064   | 11-19-12-05-17-34-24-34-22-25 | 44 | C17 | spa-CC 064   | R | neg |
| Vas081 | 44 | 2 | 1996 | t064   | 11-19-12-05-17-34-24-34-22-25 | 44 | C17 | spa-CC 064   | R | neg |
| Vas221 | 44 | 3 | 2000 | t064   | 11-19-12-05-17-34-24-34-22-25 | 45 | C17 | spa-CC 064   | R | neg |
| Vas044 | 25 | 1 | 2011 | t064   | 11-19-12-05-17-34-24-34-22-25 | 46 | C17 | spa-CC 064   | R | neg |
| Vas004 | 3  | 1 | 2006 | t064   | 11-19-12-05-17-34-24-34-22-25 | 47 | C17 | spa-CC 064   | R | neg |
| Vas040 | 22 | 4 | 2011 | t064   | 11-19-12-05-17-34-24-34-22-25 | 47 | C17 | spa-CC 064   | R | neg |
| Vas005 | 3  | 2 | 2006 | t064   | 11-19-12-05-17-34-24-34-22-25 | 47 | C17 | spa-CC 064   | R | neg |
| Vas006 | 3  | 3 | 2006 | t064   | 11-19-12-05-17-34-24-34-22-25 | 47 | C17 | spa-CC 064   | R | neg |
| Vas161 | 26 | 3 | 2003 | t064   | 11-19-12-05-17-34-24-34-22-25 | 48 | C17 | spa-CC 064   | R | neg |
| Vas188 | 26 | 5 | 2012 | t064   | 11-19-12-05-17-34-24-34-22-25 | 48 | C17 | spa-CC 064   | R | neg |
| Vas202 | 26 | 1 | 2000 | t064   | 11-19-12-05-17-34-24-34-22-25 | 48 | C17 | spa-CC 064   | R | neg |
| Vas148 | 26 | 2 | 2002 | t064   | 11-19-12-05-17-34-24-34-22-25 | 49 | C17 | spa-CC 064   | R | neg |
| Vas196 | 11 | 1 | 2000 | t1246  | 04-21-12-41-20-17-12-12-41    | 50 | C17 | singleton 10 | S | neg |
| Vas151 | 2  | 1 | 2002 | t064   | 11-19-12-05-17-34-24-34-22-25 | 51 | C17 | spa-CC 064   | R | neg |
| Vas174 | 2  | 2 | 2003 | t064   | 11-19-12-05-17-34-24-34-22-25 | 51 | C17 | spa-CC 064   | R | neg |
| Vas002 | 2  | 3 | 2006 | t064   | 11-19-12-05-17-34-24-34-22-25 | 51 | C17 | spa-CC 064   | R | neg |
| Vas003 | 2  | 4 | 2012 | t091   | 07-23-21-17-34-12-23-02-12-23 | 51 | C17 | singleton 5  | R | neg |
| Vas184 | 23 | 4 | 2012 | t12249 | 11-12-05-17-34-24-34-17-22-25 | 52 | C17 | spa-CC 064   | R | neg |
| Vas012 | 8  | 3 | 2006 | t064   | 11-19-12-05-17-34-24-34-22-25 | 53 | C17 | spa-CC 064   | R | neg |
| Vas077 | 42 | 3 | 1993 | t842   | 11-34-22-25                   | 53 | C17 | excluded     | S | neg |
| Vas209 | 19 | 1 | 2000 | t211   | 19-12-12-21-17-34-24-34-22-25 | 54 | C17 | spa-CC 064   | S | neg |
| Vas169 | 64 | 4 | 2003 | t12246 | 04-12-21-12-17-20-17-12-12-17 | 55 | C17 | singleton 16 | S | neg |
| Vas193 | 64 | 3 | 2000 | t12246 | 04-12-21-12-17-20-17-12-12-17 | 55 | C17 | singleton 16 | S | neg |
| Vas015 | 9  | 2 | 2006 | t064   | 11-19-12-05-17-34-24-34-22-25 | 56 | C17 | spa-CC 064   | R | neg |
| Vas016 | 9  | 3 | 2006 | t064   | 11-19-12-05-17-34-24-34-22-25 | 56 | C17 | spa-CC 064   | R | neg |
| Vas017 | 9  | 4 | 2006 | t064   | 11-19-12-05-17-34-24-34-22-25 | 56 | C17 | spa-CC 064   | R | neg |
| Vas175 | 9  | 1 | 2005 | t064   | 11-19-12-05-17-34-24-34-22-25 | 56 | C17 | spa-CC 064   | R | neg |
| Vas035 | 19 | 2 | 2010 | t3092  | 07-23-12-21-12-17-20-17-12-17 | 57 | C17 | singleton 13 | S | neg |
| Vas008 | 5  | 4 | 2006 | t064   | 11-19-12-05-17-34-24-34-22-25 | 57 | C17 | spa-CC 064   | S | neg |
| Vas100 | 52 | 1 | 1994 | t12248 | 08-16-02-16-13-13-34-34-16-34 | 58 | C17 | singleton 17 | S | neg |
| Vas117 | 59 | 1 | 1991 | t015   | 08-16-02-16-34-13-17-34-16-34 | 59 | C17 | singleton 1  | S | neg |
| Vas118 | 59 | 2 | 1991 | t015   | 08-16-02-16-34-13-17-34-16-34 | 59 | C17 | singleton 1  | S | neg |
| Vas013 | 8  | 4 | 2010 | t064   | 11-19-12-05-17-34-24-34-22-25 | 60 | C17 | spa-CC 064   | R | neg |
| Vas014 | 8  | 5 | 2011 | t064   | 11-19-12-05-17-34-24-34-22-25 | 60 | C17 | spa-CC 064   | R | neg |
| Vas079 | 43 | 2 | 1994 | t064   | 11-19-12-05-17-34-24-34-22-25 | 60 | C17 | spa-CC 064   | S | neg |
| Vas178 | 8  | 6 | 2012 | t064   | 11-19-12-05-17-34-24-34-22-25 | 61 | C17 | spa-CC 064   | R | neg |
| Vas166 | 11 | 2 | 2003 | t1246  | 04-21-12-41-20-17-12-12-41    | 62 | C18 | singleton 10 | S | neg |
| Vas022 | 11 | 3 | 2007 | t1246  | 04-21-12-41-20-17-12-12-41    | 62 | C18 | singleton 10 | S | neg |
| Vas191 | 11 | 4 | 2012 | t1246  | 04-21-12-41-20-17-12-12-41    | 63 | C18 | singleton 10 | S | neg |
| Vas182 | 27 | 3 | 2012 | t1508  | 15-16-34-33-13                | 64 | C19 | singleton 11 | S | neg |
| Vas046 | 27 | 2 | 2011 | t1508  | 15-16-34-33-13                | 64 | C19 | singleton 11 | S | neg |
| Vas183 | 71 | 5 | 2012 | t1361  | 08-23-02-12-23                | 65 | C19 | no founder   | R | neg |
| Vas137 | 68 | 1 | 1993 | t127   | 07-23-21-16-34-33-13          | 66 | C20 | no founder   | S | neg |
| Vas138 | 68 | 2 | 1995 | t127   | 07-23-21-16-34-33-13          | 66 | C20 | no founder   | S | neg |



|        |      |   |      |        |                                           |    |     |                |   |     |
|--------|------|---|------|--------|-------------------------------------------|----|-----|----------------|---|-----|
| Vas215 | 68   | 3 | 2000 | t127   | 07-23-21-16-34-33-13                      | 67 | C20 | no founder     | S | neg |
| Vas045 | 26   | 4 | 2011 | t451   | 11-12-05-17-34-24-22-25                   | 68 | C20 | spa-CC 064     | R | neg |
| Vas173 | 68   | 4 | 2003 | t1727  | 07-23-12-34-34-34-12-12-23-02-12-23       | 69 | C21 | spa-CC 084     | S | neg |
| Vas065 | 20   | 1 | 1992 | t359   | 07-23-12-21-17-34-34-33-34                | 70 | C21 | no founder     | S | neg |
| Vas052 | 5    | 1 | 1996 | t180   | 09-02-16-34-34-34-17-34-16-34             | 71 | C21 | spa-CC 330/180 | S | neg |
| Vas053 | 5    | 2 | 1996 | t12247 | 09-34-16-34-34-17-34-16-34                | 71 | C21 | spa-CC 330/180 | S | neg |
| Vas131 | 16   | 1 | 1993 | t330   | 09-02-16-34-34-17-34-16-34                | 72 | C21 | spa-CC 330/180 | S | neg |
| Vas132 | 16   | 2 | 1993 | t065   | 09-02-16-34-13-17-34-16-34                | 72 | C21 | spa-CC 330/180 | S | neg |
| Vas162 | 42   | 5 | 2003 | t065   | 09-02-16-34-13-17-34-16-34                | 73 | C22 | spa-CC 330/180 | S | neg |
| Vas216 | 71   | 3 | 2000 | t026   | 08-16-34                                  | 74 | C22 | excluded       | S | neg |
| Vas203 | 48   | 5 | 2000 | t043   | 09-02-16-13-13-17-13-16-34                | 75 | C23 | spa-CC 330/180 | S | neg |
| Vas059 | 35   | 1 | 1995 | t8351  | 04-17-23-24-20-24-20-17-25                | 76 | C24 | no founder     | R | neg |
| Vas060 | 35   | 2 | 1996 | t8351  | 04-17-23-24-20-24-20-17-25                | 76 | C24 | no founder     | R | neg |
| Vas168 | 39   | 4 | 2003 | t056   | 04-20-12-17-20-17-12-17-17                | 77 | C25 | singleton 3    | S | neg |
| Vas217 | 39   | 3 | 2000 | t056   | 04-20-12-17-20-17-12-17-17                | 77 | C25 | singleton 3    | S | neg |
| Vas069 | 39   | 1 | 1993 | t056   | 04-20-12-17-20-17-12-17-17                | 77 | C25 | singleton 3    | S | neg |
| Vas097 | 50   | 1 | 1993 | t120   | 07-23-12-12-34-34-12-12-23-02-12-23       | 78 | C26 | spa-CC 084     | R | neg |
| Vas098 | 50   | 2 | 1995 | t120   | 07-23-12-12-34-34-12-12-23-02-12-23       | 78 | C26 | spa-CC 084     | R | neg |
| Vas112 | 57   | 1 | 1991 | t084   | 07-23-12-34-34-12-12-23-02-12-23          | 79 | C26 | spa-CC 084     | S | neg |
| Vas129 | 65   | 1 | 1995 | t084   | 07-23-12-34-34-12-12-23-02-12-23          | 79 | C26 | spa-CC 084     | S | neg |
| Vas099 | 51   | 1 | 1995 | t084   | 07-23-12-34-34-12-12-23-02-12-23          | 79 | C26 | spa-CC 084     | R | neg |
| Vas128 | 64   | 2 | 1995 | t084   | 07-23-12-34-34-12-12-23-02-12-23          | 80 | C26 | spa-CC 084     | S | neg |
| Vas066 | 20   | 2 | 1994 | t084   | 07-23-12-34-34-12-12-23-02-12-23          | 80 | C26 | spa-CC 084     | S | neg |
| Vas067 | 38   | 1 | 1993 | t084   | 07-23-12-34-34-12-12-23-02-12-23          | 81 | C26 | spa-CC 084     | S | neg |
| Vas091 | 48   | 1 | 1993 | t084   | 07-23-12-34-34-12-12-23-02-12-23          | 82 | C26 | spa-CC 084     | R | neg |
| Vas171 | 41   | 2 | 2003 | t11401 | 07-23-21-02-12-23                         | 83 | C26 | no founder     | S | neg |
| Vas057 | 34   | 1 | 1993 | t328   | 07-23-12-34-34-12-12-23-02-12-23-02-12-23 | 83 | C26 | spa-CC 084     | S | neg |
| Vas058 | 34   | 2 | 1994 | t328   | 07-23-12-34-34-12-12-23-02-12-23-02-12-23 | 84 | C26 | spa-CC 084     | S | neg |
| Vas154 | 22   | 3 | 2002 | t346   | 07-23-12-34-12-12-23-02-12-23             | 85 | C26 | spa-CC 084     | S | neg |
| Vas090 | 47   | 1 | 1990 | t346   | 07-23-12-34-12-12-23-02-12-23             | 85 | C26 | spa-CC 084     | R | neg |
| Vas082 | 15   | 1 | 1993 | t084   | 07-23-12-34-34-12-12-23-02-12-23          | 86 | C26 | spa-CC 084     | S | neg |
| Vas083 | 15   | 2 | 1993 | t084   | 07-23-12-34-34-12-12-23-02-12-23          | 86 | C26 | spa-CC 084     | S | neg |
| Vas104 | 54   | 2 | 1992 | t084   | 07-23-12-34-34-12-12-23-02-12-23          | 87 | C26 | spa-CC 084     | R | neg |
| Vas105 | 54   | 3 | 1993 | t084   | 07-23-12-34-34-12-12-23-02-12-23          | 87 | C26 | spa-CC 084     | R | neg |
| Vas113 | 57   | 2 | 1991 | t084   | 07-23-12-34-34-12-12-23-02-12-23          | 87 | C26 | spa-CC 084     | R | neg |
| Vas114 | 57   | 3 | 1993 | t084   | 07-23-12-34-34-12-12-23-02-12-23          | 87 | C26 | spa-CC 084     | S | neg |
| Vas126 | 63   | 1 | 1993 | t084   | 07-23-12-34-34-12-12-23-02-12-23          | 87 | C26 | spa-CC 084     | S | neg |
| Vas139 | 69   | 1 | 1993 | t084   | 07-23-12-34-34-12-12-23-02-12-23          | 87 | C26 | spa-CC 084     | S | neg |
| Vas140 | 69   | 2 | 1995 | t084   | 07-23-12-34-34-12-12-23-02-12-23          | 87 | C26 | spa-CC 084     | S | neg |
| Vas141 | 70   | 1 | 1993 | t5721  | 07-34-12-12-23-02-12-23-02-12-23          | 87 | C26 | spa-CC 084     | S | neg |
| Vas142 | 70   | 2 | 1995 | t5721  | 07-34-12-12-23-02-12-23-02-12-23          | 87 | C26 | spa-CC 084     | S | neg |
| Vas146 | 1    | 1 | 2002 | t084   | 07-23-12-34-34-12-12-23-02-12-23          | 87 | C26 | spa-CC 084     | S | neg |
| Vas092 | 48   | 2 | 1993 | t084   | 07-23-12-34-34-12-12-23-02-12-23          | 87 | C26 | spa-CC 084     | S | neg |
| Vas093 | 48   | 3 | 1993 | t084   | 07-23-12-34-34-12-12-23-02-12-23          | 87 | C26 | spa-CC 084     | S | neg |
| Vas094 | 48   | 4 | 1994 | t084   | 07-23-12-34-34-12-12-23-02-12-23          | 87 | C26 | spa-CC 084     | S | neg |
| Vas206 | 56   | 3 | 2000 | t084   | 07-23-12-34-34-12-12-23-02-12-23          | 88 | C26 | spa-CC 084     | S | neg |
| Vas107 | 55   | 2 | 1996 | t084   | 07-23-12-34-34-12-12-23-02-12-23          | 89 | C26 | spa-CC 084     | S | neg |
| Vas068 | 38   | 2 | 1996 | t328   | 07-23-12-34-34-12-12-23-02-12-23-02-12-23 | 90 | C26 | spa-CC 084     | S | neg |
| Vas103 | 54   | 1 | 1991 | NT     |                                           | 91 | C27 | NT             | S | neg |
| Vas119 | 60   | 1 | 1991 | t084   | 07-23-12-34-34-12-12-23-02-12-23          | 92 | C28 | spa-CC 084     | R | neg |
| Vas120 | 60   | 2 | 1992 | t084   | 07-23-12-34-34-12-12-23-02-12-23          | 92 | C28 | spa-CC 084     | R | neg |
| Vas121 | 60   | 3 | 1995 | t084   | 07-23-12-34-34-12-12-23-02-12-23          | 93 | C28 | spa-CC 084     | R | neg |
| Vas164 | 71   | 4 | 2003 | t084   | 07-23-12-34-34-12-12-23-02-12-23          | 94 | C29 | spa-CC 084     | S | neg |
| Vas080 | 44   | 1 | 1995 | t085   | 07-23-12-34-34-12-23-02-12-23             | 95 | C30 | spa-CC 084     | S | neg |
| CC29   | HC1  | 1 | 2007 | t122   | 08-16-02-16-02-25-17-24-24                | ND | ND  | ND             | S | pos |
| CC31   | HC1  | 2 | 2010 | t122   | 08-16-02-16-02-25-17-24-24                | ND | ND  | ND             | S | pos |
| CC32   | HC2  | 3 | 2007 | t012   | 15-12-16-02-16-02-25-17-24-24             | ND | ND  | ND             | S | pos |
| CC70   | HC2  | 1 | 2010 | t091   | 07-23-21-17-34-12-23-02-12-23             | ND | ND  | ND             | S | neg |
| CC47   | HC3  | 2 | 2007 | t2109  | 07-83-22-34                               | ND | ND  | ND             | S | neg |
| CC1    | HC3  | 1 | 2010 | t2109  | 07-83-22-34                               | ND | ND  | ND             | S | neg |
| CC57   | HC4  | 2 | 2007 | t008   | 11-19-12-21-17-34-24-34-22-25             | ND | ND  | ND             | S | neg |
| IEC3   | HC4  | 1 | 2008 | t024   | 11-12-21-17-34-24-34-22-25                | ND | ND  | ND             | S | neg |
| CC82   | HC4  | 2 | 2010 | t6076  | 26-23-20-05-17-25-17-25-16-28             | ND | ND  | ND             | S | neg |
| CC7    | HC8  | 1 | 2010 | t209   | 07-16-12-23-34                            | ND | ND  | ND             | S | neg |
| CC25   | HC9  | 2 | 2010 | t091   | 07-23-21-17-34-12-23-02-12-23             | ND | ND  | ND             | S | neg |
| CC76   | HC10 | 1 | 2007 | t012   | 15-12-16-02-16-02-25-17-24-24             | ND | ND  | ND             | S | pos |
| IEC8   | HC10 | 2 | 2008 | t012   | 15-12-16-02-16-02-25-17-24-24             | ND | ND  | ND             | S | pos |
| CC26   | HC11 | 1 | 2007 | t002   | 26-23-17-34-17-20-17-12-17-16             | ND | ND  | ND             | S | pos |
| IEC10  | HC11 | 2 | 2008 | t359   | 07-23-12-21-17-34-34-33-34                | ND | ND  | ND             | S | neg |
| CC38   | HC14 | 1 | 2007 | t021   | 15-12-16-02-16-02-25-17-24                | ND | ND  | ND             | S | pos |
| IEC11  | HC14 | 2 | 2008 | t021   | 15-12-16-02-16-02-25-17-24                | ND | ND  | ND             | S | pos |
| CC107  | HC15 | 1 | 2007 | t230   | 08-16-02-16-34                            | ND | ND  | ND             | S | neg |

Abbreviations: pos = positive, neg = negative, C1 = Cluster 1, spa-CC 084 = spa clonal complex 084, NT = not typeable, ND = not determined, S = sensitive, R = resistant

## References

- Harmsen, D. *et al.* Typing of methicillin-resistant *Staphylococcus aureus* in a university hospital setting by using novel software for spa repeat determination and database management. *J. Clin. Microbiol.* **41**, 5442–5448 (2003).
- Mellmann, A. *et al.* Based Upon Repeat Pattern (BURP): an algorithm to characterize the long-term evolution of *Staphylococcus aureus* populations based on spa polymorphisms. *BMC Microbiol.* **7**, 98 (2007).
- Glasner, C. *et al.* Rapid and high-resolution distinction of community-acquired and nosocomial *Staphylococcus aureus* isolates with identical pulsed-field gel electrophoresis patterns and spa types. *Int. J. Med. Microbiol.* **303**, 70–75 (2013).

4. Sabat, A. J. *et al.* Microfluidic chip-based multiple-locus variable-number tandem repeat fingerprinting (MLVF) with new primer sets for methicillin-resistant *Staphylococcus aureus*. *J. Clin. Microbiol.* **50**, 2255–2262 (2012).

**Supplementary Table 4. Information on *Staphylococcus aureus* antigens used in the multiplex *S. aureus* antibody assay.** The relative amounts of serum IgGs against 59 *S. aureus* antigens were determined by bead-based Luminex flow cytometry (xMAP<sup>®</sup>, Luminex Corporation, Austin, Texas, USA)<sup>1</sup>. Independent duplicate Luminex assays were performed on different days, and the median fluorescence intensity (MFI), reflecting quantitative antibody levels, was averaged. To determine non-specific binding, control beads without coupled protein were included and this MFI value was subtracted from the antigen-specific MFI<sup>1,2</sup>.

| Abbreviation                                           | Explanation                                               | Function                                                                                                                                          |
|--------------------------------------------------------|-----------------------------------------------------------|---------------------------------------------------------------------------------------------------------------------------------------------------|
| <b>21 superantigens and superantigen-like proteins</b> |                                                           |                                                                                                                                                   |
| SEA-SEE; SEG-SEJ                                       | Staphylococcal enterotoxins A-E; G-J                      | Non-specific binding to T-cell receptor and MHC II of antigen presenting cells causing polyclonal T cell stimulation                              |
| SEM-SEO; SEQ; SER                                      | Staphylococcal enterotoxins M-O; Q; R                     |                                                                                                                                                   |
| TSST-1                                                 | Toxic shock syndrome toxin 1                              |                                                                                                                                                   |
| SSL1, 3, 5, 9-11                                       | Staphylococcal superantigen-like proteins 1, 3, 5, 9-11   | Stimulation of innate immunity (i.e. complement, Fc receptors, myeloid cells), but not T cells                                                    |
| <b>10 surface proteins</b>                             |                                                           |                                                                                                                                                   |
| ClfA, ClfB                                             | Clumping factor A, B                                      | Adhesins, bind to fibrinogen                                                                                                                      |
| SdrD, SdrE                                             | Serine-aspartate dipeptide repeat containing protein D, E | Adhesins, role in platelet aggregation and adherence                                                                                              |
| FnbpA, FnbpB                                           | Fibronectin-binding protein A, B                          | Adhesins, bind to fibronectin                                                                                                                     |
| IsdA, IsdH                                             | Iron-regulated surface determinants A, H                  | Bind to iron-containing proteins, such as transferrin, haemin, haemoglobin                                                                        |
| SasG                                                   | <i>S. aureus</i> surface protein G                        | Adhesin                                                                                                                                           |
| PrsA                                                   | Foldase protein                                           | Folding of secreted proteins                                                                                                                      |
| <b>26 secreted proteins</b>                            |                                                           |                                                                                                                                                   |
| ETA, ETB                                               | Exfoliative toxins A and B                                | Causative agents of staphylococcal scalded skin syndrome; serine proteases which selectively recognize and cleave desmosomal proteins in the skin |
| CHIPS                                                  | Chemotaxis inhibitory protein of <i>S. aureus</i>         | Inhibition of neutrophil and monocyte chemotaxis through binding to C5a receptor and formylpeptide receptor                                       |
| SCIN                                                   | Staphylococcal complement inhibitor                       | Complement inhibitor                                                                                                                              |
| Luk D, E, F, S                                         | Leukocidins D, E, F, S                                    | Membrane-damaging toxins causing disruption and lysis of cells                                                                                    |
| HlgB, $\alpha$ -toxin, Hlb                             | Gamma-, alpha-, and beta-hemolysin                        |                                                                                                                                                   |
| IsaA                                                   | Immunodominant staph. antigen A                           | Lytic transglycolase that cleaves peptidoglycan                                                                                                   |
| LytM                                                   | Glycylglycine endopeptidase                               | Degrades the peptidoglycan cell wall                                                                                                              |
| NUC                                                    | Nuclease                                                  | Catalyses the hydrolysis of DNA and RNA                                                                                                           |
| EsxA, EsxB                                             | ESAT-6 secretion system extracellular A, B                | Transport chaperone/adaptor proteins                                                                                                              |
| Lipase                                                 | Lipase                                                    | Lipid digestion                                                                                                                                   |
| FlipR, FlipR-L                                         | Formyl peptide receptor-like inhibitory proteins          | Inhibitor of neutrophil activation                                                                                                                |
| EAP, EapH1, EapH2                                      | Extracellular adherence proteins                          | Activator of extracellular proteases                                                                                                              |
| Pro-Atl                                                | SA0905 gene; N-terminus of bifunctional autolysin         | Propeptide of Atl                                                                                                                                 |
| Atl-2                                                  | SA0905 gene; C-terminus of bifunctional autolysin         | Glucosaminidase                                                                                                                                   |
| Aly                                                    | SA2437 gene; autolysin precursor                          |                                                                                                                                                   |
| Efb                                                    | Extracellular fibrinogen-binding protein                  | Adhesin, binds fibrinogen and C3                                                                                                                  |
| <b>2 unknown/hypothetical proteins</b>                 |                                                           |                                                                                                                                                   |

---

|        |                                   |                                    |
|--------|-----------------------------------|------------------------------------|
| SA0104 | SA0104 gene; norG protein         | HTH-type transcriptional regulator |
| SA2097 | SA2097 gene; hypothetical protein | ?                                  |

---

## References

1. Verkaik, N. J. *et al.* Anti-staphylococcal humoral immune response in persistent nasal carriers and noncarriers of *Staphylococcus aureus*. *J Infect Dis* **199**, 625–632 (2009).
2. Verkaik, N. J. *et al.* Immune evasion cluster-positive bacteriophages are highly prevalent among human *Staphylococcus aureus* strains, but they are not essential in the first stages of nasal colonization. *Clin. Microbiol. Infec.* **17**, 343–348 (2011).

**Supplementary Table 5. *S. aureus* genes identified in isolates from GPA patients and HC.** The detection of antigen-encoding genes in *S. aureus* isolates from both GPA patients and HC was determined with the Clondiag *S. aureus* Genotyping Kit 2.0 following the manufacture's instructions and as previously described (Alere Technologies GmbH, Jena, Germany)<sup>1,2</sup>. The *S. aureus* microarray contains 336 DNA probes for the detection of genes encoding for species markers, resistance, adhesion factors and virulence. Selected genes are displayed in numbers and percentages for both the 75 *S. aureus* isolates from GPA patients and the 18 *S. aureus* isolates from HC.

| Gene Name        | No. positive GPA isolates | % positive GPA isolates | No. positive HC isolates | % positive HC isolates |
|------------------|---------------------------|-------------------------|--------------------------|------------------------|
| <i>clfA</i>      | 75/75                     | 100                     | 18/18                    | 100                    |
| <i>fnbpA</i>     | 75/75                     | 100                     | 18/18                    | 100                    |
| <i>fnbpB</i>     | 66/75                     | 88                      | 11/18                    | 61                     |
| <i>sasG</i>      | 52/75                     | 70                      | 7/18                     | 39                     |
| <i>clfB</i>      | 75/75                     | 100                     | 18/18                    | 100                    |
| <i>sdrD</i>      | 66/75                     | 88                      | 14/18                    | 78                     |
| <i>hla</i>       | 72/75                     | 96                      | 18/18                    | 100                    |
| <i>lukE</i>      | 57/75                     | 76                      | 8/18                     | 44                     |
| <i>lukF</i>      | 75/75                     | 100                     | 18/18                    | 100                    |
| <i>lukS</i>      | 75/75                     | 100                     | 18/18                    | 100                    |
| <i>scn</i>       | 72/75                     | 96                      | 14/18                    | 78                     |
| <i>lukD</i>      | 61/75                     | 81                      | 6/18                     | 33                     |
| <i>chp</i>       | 31/75                     | 41                      | 12/18                    | 67                     |
| <i>hly</i>       | 66/75                     | 88                      | 17/18                    | 94                     |
| <i>nuc</i>       | 75/75                     | 100                     | 18/18                    | 100                    |
| <i>PVL</i>       | 0/75                      | 0                       | 0/18                     | 0                      |
| <i>eta</i>       | 2/75                      | 3                       | 0/18                     | 0                      |
| <i>etb</i>       | 0/75                      | 0                       | 0/18                     | 0                      |
| <i>sec</i>       | 4/75                      | 5                       | 1/18                     | 6                      |
| <i>tst-1</i>     | 4/75                      | 5                       | 8/18                     | 44                     |
| <i>protein A</i> | 75/75                     | 100                     | 18/18                    | 100                    |
| <i>ssl9</i>      | 75/75                     | 100                     | 18/18                    | 100                    |
| <i>ssl10</i>     | 75/75                     | 100                     | 18/18                    | 100                    |
| <i>ssl3</i>      | 68/75                     | 91                      | 16/18                    | 89                     |
| <i>sej</i>       | 3/75                      | 4                       | 0/18                     | 0                      |
| <i>seb</i>       | 25/75                     | 33                      | 0/18                     | 0                      |
| <i>sea</i>       | 48/75                     | 64                      | 5/18                     | 28                     |
| <i>ssl5</i>      | 75/75                     | 100                     | 18/18                    | 100                    |
| <i>seh</i>       | 4/75                      | 5                       | 0/18                     | 0                      |
| <i>ssl11</i>     | 52/75                     | 70                      | 10/18                    | 56                     |
| <i>seg</i>       | 18/75                     | 24                      | 12/18                    | 67                     |
| <i>see</i>       | 0/75                      | 0                       | 0/18                     | 0                      |
| <i>seq</i>       | 18/75                     | 24                      | 0/18                     | 0                      |
| <i>sed</i>       | 18/75                     | 24                      | 0/18                     | 0                      |
| <i>ser</i>       | 3/75                      | 4                       | 0/18                     | 0                      |
| <i>sem</i>       | 18/75                     | 24                      | 13/18                    | 72                     |
| <i>sei</i>       | 18/75                     | 24                      | 13/18                    | 72                     |
| <i>sen</i>       | 18/75                     | 24                      | 13/18                    | 72                     |
| <i>seo</i>       | 18/75                     | 24                      | 13/18                    | 72                     |

## References

1. Monecke, S., Slickers, P. & Ehrlich, R. Assignment of *Staphylococcus aureus* isolates to clonal complexes based on microarray analysis and pattern recognition. *FEMS Immunol. Med. Mic.* **53**, 237–251 (2008).
2. Monecke, S., Jatzwauk, L., Weber, S., Slickers, P. & Ehrlich, R. DNA microarray-based genotyping of methicillin-resistant *Staphylococcus aureus* strains from Eastern Saxony. *Clin. Microbiol. Infec.* **14**, 534–545 (2008).
